# Supplementary material for: Transcriptomic insight into terpenoid and carbazole alkaloid biosynthesis, and functional characterization of two terpene synthases in curry tree (Murraya koenigii)
Source: PubMed Central journal article supplement (PMC5341033; doi:10.1038/srep44126), 2017-03-08
Supplement: srep44126-s1.pdf [file srep44126-s1.pdf]

## **Supplementary Information**

**Transcriptomic insight into terpenoid and carbazole-alkaloid biosynthesis, and functional characterization of two terpene synthases in curry tree (*Murraya koenigii* L.)**

Seema Meena<sup>1#</sup>, Sarma Rajeev Kumar<sup>1#</sup>, Varun Dwivedi<sup>1#</sup>, Anup Kumar Singh<sup>1</sup>, Chandan S. Chanotiya<sup>2</sup>, Md. Qussen Akhtar<sup>3</sup>,  
Krishna Kumar<sup>1</sup>, Ajit Kumar Shasany<sup>3</sup>, and Dinesh A. Nagegowda<sup>1\*</sup>

**Table S1. List of biologically active compounds isolated from different plant parts of *M. koenigii* and their respective biological properties.**

| Biologically active compound                                                         | Part                | Biological activity                                              | References |
|--------------------------------------------------------------------------------------|---------------------|------------------------------------------------------------------|------------|
| 1,1'-Bis(2-hydroxy-3-methylcarbazole)/3,3'-Dimethyl-[1,1'-bi-9H-carbazole]-2,2'-diol | Roots & Stem bark   | -                                                                | 1          |
| 1-formyl-3-methoxy-6-methyl carbazole                                                | Leaves              | antimicrobial                                                    | 2          |
| 6,7-hydroxy-3-methylcarbazole                                                        | Stem bark           | antibacterial, antidiabetic                                      | 3, 4       |
| 3e(1e-hydroxy ethyl)-7-hydroxy-1-isobenzofuranone                                    | Roots               | antimicrobial                                                    | 5          |
| 3,3'-[oxybis(methylene)]bis99-methoxy-9H-carbazole)                                  | Leaves              | antiosteoporotic                                                 | 6          |
| 3-methyl Carbazole                                                                   | Roots               | antiinflammatory, antineoplastic                                 | 5          |
| 8,8' '-biskoenigine (bisindole alkaloid)                                             | Roots               | cytotoxic                                                        | 5          |
| 9-Carboethoxy-3-methyl-9H-carbazole/Ethyl 3-methyl-9H-carbazole-9-carboxylate        | Leaves              | antidiabetic, antioxidant, anticancer, antiulcer                 | 7, 8       |
| 9-formyl-3-methylcarbazole                                                           | Roots & Stem bark   | -                                                                | 1          |
| Bicyclomahanimbicine                                                                 | Aerial part         | antimicrobial                                                    | 6, 9       |
| Bikoeniquinone-A (bisindole alkaloid)                                                | Roots & Stem bark   | -                                                                | 1          |
| Bikoeniquinone (bisindole alkaloid)                                                  | Roots & Stem bark   | -                                                                | 1          |
| Bismurrayaquinone-A                                                                  | Fruit pulp          | antioxidant, anti- $\alpha$ -glucosidase, DNA binding, cytotoxic | 10         |
| Bisgerayafolines A–C                                                                 | Leaves & Stem bark  | antioxidant                                                      | 1, 11      |
| Bismahanine                                                                          | Fruit pulp          | -                                                                | 10         |
| Bismahanimbiniol                                                                     | Leaves & Fruit pulp | antioxidant                                                      | 10, 11     |
| Bispyarafoline                                                                       | Leaves              | antioxidant                                                      | 10, 11     |
| Bismurrayafoline E                                                                   | Roots & Stem bark   | inotropic response (triphasic)                                   | 1, 12      |
| Bismurrayaquinone-A (bisindole alkaloid)                                             |                     |                                                                  |            |

|                                                                   |                           |                                                                                         |          |
|-------------------------------------------------------------------|---------------------------|-----------------------------------------------------------------------------------------|----------|
| Chrestifoline-A                                                   | Roots                     | cytotoxic                                                                               | 1        |
| Curryangine/Mahanimbidine/Murrayazoline                           | Stem & Leaves             | cytotoxic                                                                               | 13       |
| Euchrestine-B                                                     | Leaves                    | antioxidant                                                                             | 10, 11   |
| eustifoline-C                                                     | Roots                     | -                                                                                       | 1        |
| Curryanine/Murrayazolidine/Cyc lomahanimbine (terpenoid alkaloid) | Leaves & Stem bark        | antiinflammatory                                                                        | 7        |
| Furostifoline                                                     | Stem                      | cytotoxic                                                                               | 13       |
| Girinimbilol/mukoenine-A/2-Hydroxy-3-methyl-1-prenylcarbazole     | Stem bark                 | anti-trichomonal                                                                        | 14, 15   |
| Girinimbiol                                                       | Leaves                    | hypoglycaemic, hepatoprotective                                                         | 16       |
| Girinimbine/3,11-Dihydro-3,3,5-trimethyl-Pyrano(3,2-a)carbazole   | Seeds, Leaves & stem bark | anti-trichomonal, hypoglycaemic, cytotoxic, antiplatelet agent                          | 1, 15-17 |
| Glycozoline                                                       | Roots                     | antibacterial                                                                           | 1        |
| Isomahanine/Pyrafoline D/Pyrayafoline D                           | Leaves, Seeds & Fruits    | antibacterial, cytotoxicity against HL-60 cells                                         | 18, 19   |
| isomurrayafoline-B                                                | Stem bark                 | analgesic activity                                                                      | 1, 20    |
| Isomurrayazoline                                                  | Stem bark                 | anti-amnesic, immunomodulatory                                                          | 21, 22   |
| Isomurrayazolinine                                                | Stem bark                 | -                                                                                       | 21       |
| karapinchamines A & B                                             | Leaves                    | melanogenesis                                                                           | 23       |
| Koenigine                                                         | Leaves                    | antioxidant, radical-scavenging                                                         | 2, 24    |
| Koenimbidine/Koenidine/Koenigine                                  | Roots & Leaves            | insecticidal, antidiabetic                                                              | 25, 26   |
| Koenimbine                                                        | Seeds, Leaves & Stem      | anti-diarrhea, antiinflammatory, antimicrobial                                          | 27, 28   |
| Koenine                                                           | Leaves, seeds             | anti-diarrhea                                                                           | 27       |
| Koenoline/1-Methoxy-9H-carbazole-3-methanol                       | Roots & Stem bark         | anti-tumor                                                                              | 29       |
| Kurryam                                                           | seeds                     | anti-diarrhea                                                                           | 27       |
| Mahanimbicine/Isomahanimbine                                      | Roots & Leaves            | anticancer, antimicrobial, mosquitocidal, antiproliferative, wound healing, antioxidant | 11, 30   |

|                                                                         |                                                       |                                                                                                                                                                                               |                       |
|-------------------------------------------------------------------------|-------------------------------------------------------|-----------------------------------------------------------------------------------------------------------------------------------------------------------------------------------------------|-----------------------|
| Mahanimbine                                                             | Roots, Leaves,<br>Stem bark &<br>Seeds                | antidiabetic, hypolipidemic,<br>antimicrobial, mosquitocidal,<br>antioxidant, antiinflammatory,<br>antiproliferative, anti-diarrhea,<br>antitumor, wound healing                              | 11, 25, 27,<br>30, 31 |
| Mahanimbinine (terpenoid alkaloid)                                      | Leaves & Seeds                                        | antioxidant, anti-microbial                                                                                                                                                                   | 7, 8                  |
| Mahanimbilol                                                            | Stem bark                                             | antitrichomal                                                                                                                                                                                 | 14, 15                |
| Mahanimbinol/1-(3,7-Dimethyl-octa-2,6-dienyl)-3-methyl-9H-carbazol-2-ol | Stem bark                                             | cytotoxic                                                                                                                                                                                     | 1                     |
| Mahanimboline                                                           | Roots                                                 | anti-diarrhea, antibacterial                                                                                                                                                                  | 27                    |
| Mahanine                                                                | Leaves, Roots,<br>Stem bark,<br>Seeds & Fruit<br>pulp | anticancer, antioxidant,<br>antimicrobial, mosquitocidal,<br>antiinflammatory, antiproliferative,<br>anti-diarrhea, wound healing,<br>radical scavenging, $\alpha$ -glucosidase<br>inhibitory | 10, 11, 19,<br>27, 30 |
| Mukonal/2-Hydroxy-9H-carbazole-3-carboxaldehyde                         | Stem bark                                             | antifungal                                                                                                                                                                                    | 32, 33                |
| Mukoeic acid                                                            | Stem bark                                             | antioxidant                                                                                                                                                                                   | 34                    |
| Mukolidine/3-Formyl-8-methoxycarbazole/6-Formyl-1-methoxycarbazole      | Roots                                                 | -                                                                                                                                                                                             | 35                    |
| Mukoline/6-Hydroxymethyl-1-methoxycarbazole                             | Roots                                                 | antibacterial                                                                                                                                                                                 | 35                    |
| Mukonicine                                                              | Leaves                                                | antioxidant                                                                                                                                                                                   | 36                    |
| Mukonidine                                                              | Stem bark                                             | -                                                                                                                                                                                             | 10                    |
| Mukoenine-B/3-Formyl-1-geranyl-2-hydroxycarbazole                       | roots                                                 | -                                                                                                                                                                                             | 1                     |
| Mukoenine-C/Murrayamine A                                               | roots                                                 | -                                                                                                                                                                                             | 1                     |
| Mukoenigatin                                                            | aerial part                                           | -                                                                                                                                                                                             | 9                     |
| Murrafoline -A, B, C, D, G, H                                           | -                                                     | -                                                                                                                                                                                             | 1                     |
| Murrafoline-I                                                           | -                                                     | cytotoxicity against HL-60 cells                                                                                                                                                              | 19                    |
| Murrayacine                                                             | Stem bark                                             | -                                                                                                                                                                                             | 25                    |
| Murrayacinine                                                           | Leaves                                                | antioxidant, antimicrobial,<br>antidiabetic                                                                                                                                                   | 8                     |

|                                                                         |                     |                                                                         |           |
|-------------------------------------------------------------------------|---------------------|-------------------------------------------------------------------------|-----------|
| Murrayanine/1-Methoxy-9H-carbazole-3-carbaldehyde                       | Leaf & Stem bark    | antimicrobial, neuroprotective, antiinflammatory                        | 6, 37, 38 |
| Murrayadinal                                                            | aerial part         | -                                                                       | 9         |
| Murrayanol                                                              | Leaves & Seeds      | antimicrobial, antioxidant, mosquitocidal, antiinflammatory, anticancer | 18, 39    |
| Murrayafoline-A                                                         | Stem bark & Roots   | anticancer                                                              | 1, 40     |
| Murrastifoline-F/1,1'-Dimethoxy-3,3'-dimethyl-4,9'-bi-9H-carbazole, 9CI | Roots               | -                                                                       | 1         |
| Murrayaquinone-A                                                        | Stem bark & Roots   | anticancer                                                              | 1, 40     |
| Murrayaquinone-B                                                        | Stem bark           | -                                                                       | 1         |
| Murrayaquinoline                                                        | Stem                | cytotoxic                                                               | 13        |
| Murrayazolinine                                                         | Stem bark           | cytotoxic                                                               | 13        |
| Murrayazolinol                                                          | Roots & Stem bark   | -                                                                       | 41        |
| O-methyl murrayamine A                                                  | Leaves              | -                                                                       | 10, 11    |
| O-methyl mahanine                                                       | Leaves & Fruit pulp | -                                                                       | 10, 11    |
| O-methyl mukanol                                                        | Leaves & Fruit pulp | -                                                                       | 10, 11    |
| Scopolin                                                                | Leaves              | antiinflammatory, anti-dementia                                         | 38        |
| Xanthotoxin                                                             | Seeds               | used to treat psoriasis, eczema, vitiligo & some cutaneous lymphomas    | 42        |
| Isobyakangelicol                                                        | Seeds               | -                                                                       | 42        |
| Phellopterin                                                            | Seeds               | neuroprotective                                                         | 42        |
| Gosferol                                                                | Seeds               | -                                                                       | 42        |
| Neobyakangelicol                                                        | Seeds               | -                                                                       | 42        |
| Byakangelicol                                                           | Seeds               | -                                                                       | 42        |
| Byakangelicin                                                           | Seeds               | Antidiabetic & anticataract                                             | 42        |
| Isogosferol                                                             | Seeds               | -                                                                       | 42        |

**Table S2. Summary of RNA-Seq.**

|                                                                | <i>Murraya koenigii</i>    |
|----------------------------------------------------------------|----------------------------|
| <b>Total Number of HQ Reads</b>                                | <b>50311257 (50.31 Mb)</b> |
| <b>Number of paired-end reads after trimming/filtered</b>      | <b>46517951(46.51 Mb)</b>  |
| <b>Mean read quality (Phred score)</b>                         | <b>35.415</b>              |
| <b>Number of bases (MB)</b>                                    | <b>5081.44</b>             |
| <b>Number of bases (Gb) after trimming</b>                     | <b>3.72</b>                |
| <b>Mean read length (bp)</b>                                   | <b>101</b>                 |
| <b>kmer size</b>                                               | <b>41</b>                  |
| <b>Number of assembled transcripts</b>                         | <b>118,221</b>             |
| <b>No. of transcripts with length <math>\geq</math> 150 bp</b> | <b>113,931</b>             |
| <b>Maximum transcript length (bp)</b>                          | <b>12,154</b>              |
| <b>Mean GC % of transcripts</b>                                | <b>40.79</b>               |
| <b>Number of transcripts with FPKM <math>\geq</math> 1.0</b>   | <b>102,857</b>             |
| <b>N50 value</b>                                               | <b>1733</b>                |

**Table S3: Annotation summary of *M. koenigii* leaf transcriptome.**

Abbreviation: TNAT-Total number of annotated transcripts.

| <b>Database</b>          | <b>TNAT</b>   | <b>Percentage(%)</b> |
|--------------------------|---------------|----------------------|
| <b>NCBI</b>              | <b>87,417</b> | <b>84.98</b>         |
| <b>Uniprot</b>           | <b>54,887</b> | <b>53.36</b>         |
| <b>KEGG</b>              | <b>30708</b>  | <b>29.94</b>         |
| <b>AGRIS</b>             | <b>8261</b>   | <b>8.03</b>          |
| <b>Total transcripts</b> | <b>102857</b> | <b>100</b>           |

**Table S4. Transcripts for prenyltransferase gene family with unknown function identified in *M. koenigii* leaf transcriptome.**

NA- Not annotated

| Transcript ID                                            | Read count | FPKM    | Gene name                                 | Organism                   | GO term                                                    |
|----------------------------------------------------------|------------|---------|-------------------------------------------|----------------------------|------------------------------------------------------------|
| Locus_9584_Transcript_4/8_Confidence_0.333_Length_920    | 381        | 8.90259 | hypothetical protein<br>CICLE_v10000458mg | <i>Citrus clementina</i>   | protein prenylation; protein prenyltransferase activity    |
| Locus_10147_Transcript_10/11_Confidence_0.188_Length_747 | 160        | 4.60446 | hypothetical protein<br>CICLE_v10020293mg | <i>Citrus clementina</i>   | protein prenylation; protein prenyltransferase activity    |
| Locus_10147_Transcript_11/11_Confidence_0.062_Length_747 | 158        | 4.54691 | hypothetical protein<br>CICLE_v10020293mg | <i>Citrus clementina</i>   | protein prenylation; protein prenyltransferase activity    |
| Locus_10147_Transcript_7/11_Confidence_0.438_Length_1027 | 255        | 5.33764 | hypothetical protein<br>CICLE_v10020293mg | <i>Citrus clementina</i>   | protein prenylation; protein prenyltransferase activity    |
| Locus_10147_Transcript_8/11_Confidence_0.250_Length_1218 | 250        | 4.41237 | hypothetical protein<br>CICLE_v10020293mg | <i>Citrus clementina</i>   | protein prenylation; protein prenyltransferase activity    |
| Locus_10311_Transcript_1/5_Confidence_0.667_Length_1420  | 1801       | 27.265  | hypothetical protein<br>CICLE_v10011942mg | <i>Citrus clementina</i>   | integral component of membrane; prenyltransferase activity |
| Locus_10311_Transcript_2/5_Confidence_0.667_Length_1494  | 1966       | 28.2887 | hypothetical protein<br>CICLE_v10011942mg | <i>Citrus clementina</i>   | integral component of membrane; prenyltransferase activity |
| Locus_2984_Transcript_4/4_Confidence_0.222_Length_574    | 131        | 4.90613 | hypothetical protein<br>CICLE_v10020293mg | <i>Citrus clementina</i>   | protein prenylation; protein prenyltransferase activity    |
| Locus_565_Transcript_12/20_Confidence_0.484_Length_1409  | 2635       | 40.2021 | prenyltransferase                         | <i>Populus trichocarpa</i> | NA                                                         |
| Locus_7997_Transcript_1/5_Confidence_0.833_Length_689    | 513        | 16.0058 | prenyltransferase                         | <i>Populus trichocarpa</i> | NA                                                         |
| Locus_7997_Transcript_2/5_Confidence_0.667_Length_651    | 485        | 16.0155 | prenyltransferase                         | <i>Populus trichocarpa</i> | NA                                                         |
| Locus_7997_Transcript_3/5_Confidence_0.500_Length_617    | 433        | 15.0863 | prenyltransferase                         | <i>Populus trichocarpa</i> | NA                                                         |
| Locus_7997_Transcript_4/5_Confidence_0.667_Length_1435   | 493        | 7.38541 | prenyltransferase                         | <i>Populus trichocarpa</i> | NA                                                         |
| Locus_7997_Transcript_5/5_Confidence_0.167_Length_1577   | 543        | 7.40197 | prenyltransferase                         | <i>Populus trichocarpa</i> | NA                                                         |



**Table S5. Transcripts for methyltransferase gene family with unknown function identified in *M. koenigii* leaf transcriptome.**

NA- Not annotated.

| Transcript ID                                            | Read count | FPKM    | Gene name                                            | Organism                                   | GO term |
|----------------------------------------------------------|------------|---------|------------------------------------------------------|--------------------------------------------|---------|
| Locus_14513_Transcript_1/1_Confidence_0.000_Length_1760  | 281        | 3.4322  | Methyltransferase                                    | <i>Theobroma cacao</i>                     | NA      |
| Locus_30864_Transcript_1/1_Confidence_0.000_Length_272   | 13         | 1.02743 | Methyltransferase                                    | <i>Ajellomyces dermatitidis</i> ATCC 18188 | NA      |
| Locus_22721_Transcript_1/1_Confidence_0.000_Length_836   | 57         | 1.46571 | Methyltransferase family protein, putative           | <i>Theobroma cacao</i>                     | NA      |
| Locus_22721_Transcript_1/1_Confidence_0.000_Length_836   | 57         | 1.46571 | Methyltransferase family protein, putative           | <i>Theobroma cacao</i>                     | NA      |
| Locus_4840_Transcript_10/28_Confidence_0.343_Length_2009 | 670        | 7.16926 | Methyltransferase family protein isoform 2           | <i>Theobroma cacao</i>                     | NA      |
| Locus_4840_Transcript_11/28_Confidence_0.314_Length_1923 | 639        | 7.14333 | Methyltransferase family protein isoform 2           | <i>Theobroma cacao</i>                     | NA      |
| Locus_4840_Transcript_13/28_Confidence_0.171_Length_569  | 370        | 13.9788 | Methyltransferase family protein isoform 2           | <i>Theobroma cacao</i>                     | NA      |
| Locus_4840_Transcript_14/28_Confidence_0.171_Length_572  | 367        | 13.7927 | Methyltransferase family protein isoform 2           | <i>Theobroma cacao</i>                     | NA      |
| Locus_4840_Transcript_17/28_Confidence_0.343_Length_2125 | 633        | 6.4036  | Methyltransferase family protein isoform 2           | <i>Theobroma cacao</i>                     | NA      |
| Locus_4840_Transcript_18/28_Confidence_0.114_Length_685  | 334        | 10.4818 | Methyltransferase family protein isoform 2           | <i>Theobroma cacao</i>                     | NA      |
| Locus_4840_Transcript_24/28_Confidence_0.314_Length_1107 | 451        | 8.75807 | Methyltransferase family protein isoform 2           | <i>Theobroma cacao</i>                     | NA      |
| Locus_4840_Transcript_25/28_Confidence_0.086_Length_1392 | 453        | 6.99582 | Methyltransferase family protein isoform 2           | <i>Theobroma cacao</i>                     | NA      |
| Locus_4840_Transcript_22/28_Confidence_0.171_Length_701  | 163        | 4.99861 | Methyltransferase family protein isoform 4           | <i>Theobroma cacao</i>                     | NA      |
| Locus_4840_Transcript_23/28_Confidence_0.171_Length_1126 | 203        | 3.87558 | Methyltransferase family protein isoform 4           | <i>Theobroma cacao</i>                     | NA      |
| Locus_7879_Transcript_2/3_Confidence_0.400_Length_919    | 530        | 12.3977 | PREDICTED: putative methyltransferase At1g22800-like | <i>Citrus sinensis</i>                     | NA      |

|                                                          |      |         |                                                                                       |                        |    |
|----------------------------------------------------------|------|---------|---------------------------------------------------------------------------------------|------------------------|----|
| Locus_14985_Transcript_1/4_Confidence_0.500_Length_570   | 115  | 4.33713 | PREDICTED: putative methyltransferase At1g22800-like                                  | <i>Citrus sinensis</i> | NA |
| Locus_14985_Transcript_2/4_Confidence_0.333_Length_540   | 108  | 4.29942 | PREDICTED: putative methyltransferase At1g22800-like                                  | <i>Citrus sinensis</i> | NA |
| Locus_14985_Transcript_3/4_Confidence_0.500_Length_595   | 105  | 3.7936  | PREDICTED: putative methyltransferase At1g22800-like                                  | <i>Citrus sinensis</i> | NA |
| Locus_14985_Transcript_4/4_Confidence_0.000_Length_660   | 108  | 3.5177  | PREDICTED: putative methyltransferase At1g22800-like                                  | <i>Citrus sinensis</i> | NA |
| Locus_2014_Transcript_6/12_Confidence_0.067_Length_199   | 18   | 1.94446 | PREDICTED: uncharacterized methyltransferase WBSR22-like                              | <i>Cucumis sativus</i> | NA |
| Locus_10007_Transcript_1/7_Confidence_0.333_Length_1091  | 1975 | 38.9154 | PREDICTED: uncharacterized methyltransferase At1g78140, chloroplastic-like isoform X1 | <i>Citrus sinensis</i> | NA |
| Locus_10007_Transcript_3/7_Confidence_0.667_Length_1604  | 2196 | 29.4312 | PREDICTED: uncharacterized methyltransferase At1g78140, chloroplastic-like isoform X1 | <i>Citrus sinensis</i> | NA |
| Locus_10007_Transcript_4/7_Confidence_0.583_Length_1709  | 2172 | 27.321  | PREDICTED: uncharacterized methyltransferase At1g78140, chloroplastic-like isoform X1 | <i>Citrus sinensis</i> | NA |
| Locus_10007_Transcript_5/7_Confidence_0.583_Length_1694  | 2034 | 25.8117 | PREDICTED: uncharacterized methyltransferase At1g78140, chloroplastic-like isoform X1 | <i>Citrus sinensis</i> | NA |
| Locus_10007_Transcript_6/7_Confidence_0.417_Length_1064  | 639  | 12.9104 | PREDICTED: uncharacterized methyltransferase At1g78140, chloroplastic-like isoform X1 | <i>Citrus sinensis</i> | NA |
| Locus_10007_Transcript_7/7_Confidence_0.250_Length_1604  | 2199 | 29.4714 | PREDICTED: uncharacterized methyltransferase At1g78140, chloroplastic-like isoform X1 | <i>Citrus sinensis</i> | NA |
| Locus_10007_Transcript_2/7_Confidence_0.167_Length_670   | 1309 | 41.9995 | PREDICTED: uncharacterized methyltransferase At1g78140, chloroplastic-like isoform X2 | <i>Citrus sinensis</i> | NA |
| Locus_2847_Transcript_10/29_Confidence_0.289_Length_2063 | 6881 | 71.7021 | PREDICTED: uncharacterized methyltransferase At2g41040, chloroplastic-like            | <i>Citrus sinensis</i> | NA |
| Locus_2847_Transcript_11/29_Confidence_0.200_Length_1165 | 3223 | 59.4722 | PREDICTED: uncharacterized methyltransferase At2g41040, chloroplastic-like            | <i>Citrus sinensis</i> | NA |
| Locus_2847_Transcript_12/29_Confidence_0.222_Length_1205 | 4544 | 81.0645 | PREDICTED: uncharacterized methyltransferase At2g41040, chloroplastic-like            | <i>Citrus sinensis</i> | NA |
| Locus_2847_Transcript_2/29_Confidence_0.133_Length_948   | 2382 | 54.0148 | PREDICTED: uncharacterized methyltransferase At2g41040, chloroplastic-like            | <i>Citrus sinensis</i> | NA |
| Locus_2847_Transcript_3/29_Confidence_0.222_Length_936   | 5215 | 119.773 | PREDICTED: uncharacterized methyltransferase At2g41040, chloroplastic-like            | <i>Citrus sinensis</i> | NA |
| Locus_2847_Transcript_4/29_Confidence_0.267_Length_1039  | 5481 | 113.403 | PREDICTED: uncharacterized methyltransferase At2g41040, chloroplastic-like            | <i>Citrus sinensis</i> | NA |

|                                                         |      |         |                                                                            |                        |    |
|---------------------------------------------------------|------|---------|----------------------------------------------------------------------------|------------------------|----|
| Locus_2847_Transcript_5/29_Confidence_0.289_Length_1204 | 5877 | 104.932 | PREDICTED: uncharacterized methyltransferase At2g41040, chloroplastic-like | <i>Citrus sinensis</i> | NA |
| Locus_2847_Transcript_6/29_Confidence_0.289_Length_1973 | 6640 | 72.347  | PREDICTED: uncharacterized methyltransferase At2g41040, chloroplastic-like | <i>Citrus sinensis</i> | NA |
| Locus_2847_Transcript_7/29_Confidence_0.289_Length_1952 | 5393 | 59.3923 | PREDICTED: uncharacterized methyltransferase At2g41040, chloroplastic-like | <i>Citrus sinensis</i> | NA |
| Locus_2847_Transcript_9/29_Confidence_0.311_Length_1294 | 6120 | 101.671 | PREDICTED: uncharacterized methyltransferase At2g41040, chloroplastic-like | <i>Citrus sinensis</i> | NA |

**Table S6a: Cytochrome P450 families identified in *M. koenigii* leaf transcriptome putatively involved in Secondary metabolic pathways**

| <b>CYP Family</b>                                              | <b>Locus</b>                                                    |
|----------------------------------------------------------------|-----------------------------------------------------------------|
| <b>CYP51</b>                                                   | <b>Locus_7540_Transcript_1/1_Confidence_0.000_Length_1583</b>   |
|                                                                | <b>Locus_31208_Transcript_1/2_Confidence_0.333_Length_398</b>   |
| <b>CYP70</b>                                                   | <b>Locus_21790_Transcript_3/3_Confidence_0.000_Length_307</b>   |
| <b>CYP71</b>                                                   | <b>Locus_2163_Transcript_6/11_Confidence_0.269_Length_721</b>   |
|                                                                | <b>Locus_2163_Transcript_10/11_Confidence_0.385_Length_1465</b> |
|                                                                | <b>Locus_2163_Transcript_1/11_Confidence_0.269_Length_681</b>   |
|                                                                | <b>Locus_7712_Transcript_6/10_Confidence_0.455_Length_726</b>   |
|                                                                | <b>Locus_3183_Transcript_12/23_Confidence_0.129_Length_663</b>  |
|                                                                | <b>Locus_2658_Transcript_11/69_Confidence_0.035_Length_241</b>  |
|                                                                | <b>Locus_21900_Transcript_1/1_Confidence_0.000_Length_150</b>   |
|                                                                | <b>Locus_16873_Transcript_1/2_Confidence_0.333_Length_467</b>   |
|                                                                | <b>Locus_2312_Transcript_4/9_Confidence_0.417_Length_2270</b>   |
|                                                                | <b>Locus_2312_Transcript_3/9_Confidence_0.458_Length_2289</b>   |
|                                                                | <b>Locus_2312_Transcript_1/9_Confidence_0.458_Length_2300</b>   |
|                                                                | <b>Locus_2312_Transcript_5/9_Confidence_0.208_Length_2261</b>   |
|                                                                | <b>Locus_2312_Transcript_2/9_Confidence_0.458_Length_2411</b>   |
|                                                                | <b>Locus_24492_Transcript_1/1_Confidence_0.000_Length_305</b>   |
|                                                                | <b>Locus_9952_Transcript_4/4_Confidence_0.000_Length_910</b>    |
| <b>Locus_19197_Transcript_1/1_Confidence_0.000_Length_425</b>  |                                                                 |
| <b>Locus_3026_Transcript_55/74_Confidence_0.028_Length_342</b> |                                                                 |
| <b>Locus_3356_Transcript_3/48_Confidence_0.074_Length_3952</b> |                                                                 |
| <b>Locus_3356_Transcript_8/48_Confidence_0.037_Length_4106</b> |                                                                 |
| <b>Locus_3356_Transcript_4/48_Confidence_0.025_Length_2472</b> |                                                                 |
| <b>Locus_2658_Transcript_8/69_Confidence_0.053_Length_357</b>  |                                                                 |
| <b>Locus_2658_Transcript_9/69_Confidence_0.053_Length_391</b>  |                                                                 |

|       |                                                          |
|-------|----------------------------------------------------------|
|       | Locus_2658_Transcript_37/69_Confidence_0.053_Length_523  |
|       | Locus_2658_Transcript_7/69_Confidence_0.041_Length_593   |
|       | Locus_2658_Transcript_41/69_Confidence_0.058_Length_938  |
|       | Locus_37231_Transcript_1/1_Confidence_1.000_Length_220   |
|       | Locus_2658_Transcript_1/69_Confidence_0.029_Length_667   |
|       | Locus_2658_Transcript_2/69_Confidence_0.023_Length_352   |
|       | Locus_2658_Transcript_3/69_Confidence_0.023_Length_456   |
|       | Locus_2658_Transcript_10/69_Confidence_0.041_Length_299  |
|       | Locus_2656_Transcript_2/3_Confidence_0.455_Length_813    |
|       | Locus_2656_Transcript_1/3_Confidence_0.182_Length_447    |
|       | Locus_2658_Transcript_52/69_Confidence_0.041_Length_228  |
|       | Locus_2658_Transcript_64/69_Confidence_0.292_Length_3126 |
|       | Locus_2658_Transcript_25/69_Confidence_0.135_Length_1122 |
|       | Locus_2658_Transcript_67/69_Confidence_0.222_Length_3336 |
|       | Locus_2658_Transcript_61/69_Confidence_0.251_Length_3206 |
|       | Locus_2658_Transcript_4/69_Confidence_0.070_Length_321   |
|       | Locus_2658_Transcript_5/69_Confidence_0.058_Length_288   |
|       | Locus_3026_Transcript_52/74_Confidence_0.028_Length_578  |
|       | Locus_3026_Transcript_53/74_Confidence_0.043_Length_732  |
|       | Locus_11455_Transcript_1/1_Confidence_0.000_Length_1818  |
|       | Locus_37069_Transcript_1/1_Confidence_0.667_Length_170   |
|       | Locus_29371_Transcript_1/1_Confidence_0.000_Length_407   |
|       | Locus_8228_Transcript_1/1_Confidence_0.000_Length_1766   |
| CYP72 | Locus_7712_Transcript_7/10_Confidence_0.409_Length_670   |
|       | Locus_7712_Transcript_10/10_Confidence_0.273_Length_1276 |
|       | Locus_7712_Transcript_8/10_Confidence_0.500_Length_1274  |
|       | Locus_2163_Transcript_4/11_Confidence_0.346_Length_684   |
|       | Locus_7712_Transcript_2/10_Confidence_0.500_Length_852   |
|       | Locus_7712_Transcript_1/10_Confidence_0.500_Length_850   |
|       | Locus_2163_Transcript_5/11_Confidence_0.308_Length_699   |

|  |                                                          |
|--|----------------------------------------------------------|
|  | Locus_7712_Transcript_9/10_Confidence_0.545_Length_965   |
|  | Locus_7712_Transcript_5/10_Confidence_0.409_Length_1394  |
|  | Locus_7712_Transcript_4/10_Confidence_0.500_Length_1392  |
|  | Locus_2163_Transcript_2/11_Confidence_0.269_Length_830   |
|  | Locus_2843_Transcript_18/18_Confidence_0.200_Length_3790 |
|  | Locus_2843_Transcript_17/18_Confidence_0.533_Length_3870 |
|  | Locus_1265_Transcript_5/69_Confidence_0.059_Length_929   |
|  | Locus_1265_Transcript_2/69_Confidence_0.034_Length_581   |
|  | Locus_1265_Transcript_61/69_Confidence_0.109_Length_1394 |
|  | Locus_9283_Transcript_2/2_Confidence_0.000_Length_1221   |
|  | Locus_1265_Transcript_37/69_Confidence_0.034_Length_515  |
|  | Locus_1265_Transcript_46/69_Confidence_0.084_Length_866  |
|  | Locus_1265_Transcript_43/69_Confidence_0.059_Length_847  |
|  | Locus_27095_Transcript_1/1_Confidence_0.000_Length_405   |
|  | Locus_1265_Transcript_41/69_Confidence_0.059_Length_637  |
|  | Locus_1265_Transcript_39/69_Confidence_0.076_Length_637  |
|  | Locus_1265_Transcript_35/69_Confidence_0.076_Length_649  |
|  | Locus_1265_Transcript_36/69_Confidence_0.076_Length_675  |
|  | Locus_1265_Transcript_40/69_Confidence_0.076_Length_759  |
|  | Locus_1265_Transcript_1/69_Confidence_0.034_Length_831   |
|  | Locus_1265_Transcript_3/69_Confidence_0.042_Length_839   |
|  | Locus_1265_Transcript_56/69_Confidence_0.059_Length_554  |
|  | Locus_1265_Transcript_66/69_Confidence_0.067_Length_424  |
|  | Locus_1265_Transcript_4/69_Confidence_0.025_Length_580   |
|  | Locus_1265_Transcript_55/69_Confidence_0.059_Length_918  |
|  | Locus_1265_Transcript_51/69_Confidence_0.126_Length_961  |
|  | Locus_1265_Transcript_33/69_Confidence_0.109_Length_1413 |
|  | Locus_1265_Transcript_32/69_Confidence_0.118_Length_1569 |
|  | Locus_23869_Transcript_1/1_Confidence_0.000_Length_221   |
|  | Locus_27253_Transcript_1/1_Confidence_0.000_Length_396   |

|              |                                                           |
|--------------|-----------------------------------------------------------|
|              | Locus_1265_Transcript_60/69_Confidence_0.025_Length_469   |
|              | Locus_1265_Transcript_57/69_Confidence_0.042_Length_1162  |
|              | Locus_1265_Transcript_63/69_Confidence_0.067_Length_424   |
|              | Locus_1265_Transcript_67/69_Confidence_0.050_Length_424   |
|              | Locus_1265_Transcript_65/69_Confidence_0.050_Length_670   |
|              | Locus_3026_Transcript_15/74_Confidence_0.043_Length_449   |
|              | Locus_3026_Transcript_14/74_Confidence_0.014_Length_449   |
|              | Locus_3026_Transcript_31/74_Confidence_0.014_Length_511   |
|              | Locus_3026_Transcript_27/74_Confidence_0.043_Length_757   |
|              | Locus_3026_Transcript_28/74_Confidence_0.035_Length_757   |
|              | Locus_1900_Transcript_12/104_Confidence_0.040_Length_1345 |
|              | Locus_1900_Transcript_13/104_Confidence_0.015_Length_919  |
|              | Locus_9283_Transcript_1/2_Confidence_0.333_Length_1824    |
| <b>CYP73</b> | Locus_5435_Transcript_3/3_Confidence_0.000_Length_865     |
|              | Locus_5435_Transcript_2/3_Confidence_0.333_Length_1897    |
|              | Locus_5435_Transcript_1/3_Confidence_0.667_Length_1101    |
|              | Locus_25834_Transcript_1/1_Confidence_0.000_Length_811    |
|              | Locus_32754_Transcript_1/1_Confidence_0.000_Length_506    |
|              | Locus_30656_Transcript_1/1_Confidence_0.000_Length_217    |
|              | Locus_32312_Transcript_1/1_Confidence_0.000_Length_161    |
| <b>CYP74</b> | Locus_2093_Transcript_5/5_Confidence_0.111_Length_1720    |
|              | Locus_2093_Transcript_4/5_Confidence_0.333_Length_2108    |
|              | Locus_2093_Transcript_3/5_Confidence_0.333_Length_2201    |
|              | Locus_2093_Transcript_2/5_Confidence_0.222_Length_998     |
|              | Locus_2093_Transcript_1/5_Confidence_0.111_Length_1136    |
|              | Locus_11826_Transcript_1/4_Confidence_0.714_Length_2049   |
|              | Locus_11826_Transcript_4/4_Confidence_0.143_Length_2049   |
|              | Locus_11826_Transcript_2/4_Confidence_0.714_Length_2061   |
|              | Locus_11826_Transcript_3/4_Confidence_0.429_Length_1919   |
| <b>CYP75</b> | Locus_6034_Transcript_6/15_Confidence_0.600_Length_2103   |

|              |                                                          |
|--------------|----------------------------------------------------------|
|              | Locus_31518_Transcript_1/1_Confidence_0.000_Length_381   |
|              | Locus_6034_Transcript_12/15_Confidence_0.320_Length_1242 |
|              | Locus_6034_Transcript_8/15_Confidence_0.560_Length_1504  |
|              | Locus_6034_Transcript_14/15_Confidence_0.280_Length_1817 |
|              | Locus_21489_Transcript_1/1_Confidence_0.000_Length_203   |
|              | Locus_16409_Transcript_3/4_Confidence_0.500_Length_1727  |
|              | Locus_16409_Transcript_1/4_Confidence_0.750_Length_1728  |
|              | Locus_16409_Transcript_4/4_Confidence_0.000_Length_1652  |
|              | Locus_16409_Transcript_2/4_Confidence_0.250_Length_1653  |
|              | Locus_11745_Transcript_2/2_Confidence_0.000_Length_1803  |
|              | Locus_11745_Transcript_1/2_Confidence_0.750_Length_1596  |
| <b>CYP76</b> | Locus_384_Transcript_17/34_Confidence_0.068_Length_507   |
|              | Locus_384_Transcript_4/34_Confidence_0.095_Length_215    |
|              | Locus_384_Transcript_8/34_Confidence_0.027_Length_518    |
|              | Locus_22631_Transcript_1/1_Confidence_0.000_Length_257   |
|              | Locus_384_Transcript_22/34_Confidence_0.095_Length_540   |
|              | Locus_384_Transcript_23/34_Confidence_0.149_Length_679   |
|              | Locus_384_Transcript_27/34_Confidence_0.135_Length_683   |
|              | Locus_13518_Transcript_1/2_Confidence_0.750_Length_1779  |
|              | Locus_384_Transcript_5/34_Confidence_0.216_Length_664    |
|              | Locus_384_Transcript_6/34_Confidence_0.162_Length_731    |
|              | Locus_384_Transcript_11/34_Confidence_0.257_Length_846   |
|              | Locus_384_Transcript_10/34_Confidence_0.257_Length_854   |
|              | Locus_384_Transcript_3/34_Confidence_0.095_Length_461    |
|              | Locus_384_Transcript_12/34_Confidence_0.203_Length_846   |
|              | Locus_384_Transcript_14/34_Confidence_0.216_Length_910   |
|              | Locus_13518_Transcript_2/2_Confidence_0.000_Length_1850  |
|              | Locus_18083_Transcript_1/2_Confidence_1.000_Length_266   |
| <b>CYP78</b> | Locus_12021_Transcript_1/1_Confidence_0.000_Length_564   |
|              | Locus_10475_Transcript_5/11_Confidence_0.500_Length_2157 |



|       |                                                           |
|-------|-----------------------------------------------------------|
|       | Locus_10475_Transcript_7/11_Confidence_0.188_Length_1295  |
|       | Locus_10475_Transcript_9/11_Confidence_0.125_Length_1785  |
|       | Locus_6692_Transcript_2/2_Confidence_0.333_Length_810     |
|       | Locus_6692_Transcript_1/2_Confidence_0.667_Length_803     |
|       | Locus_21638_Transcript_1/1_Confidence_0.000_Length_701    |
|       | Locus_12984_Transcript_1/1_Confidence_0.000_Length_728    |
| CYP79 | Locus_10851_Transcript_10/11_Confidence_0.476_Length_1586 |
|       | Locus_3183_Transcript_1/23_Confidence_0.065_Length_379    |
|       | Locus_5093_Transcript_3/4_Confidence_0.400_Length_2576    |
|       | Locus_5093_Transcript_2/4_Confidence_0.600_Length_2353    |
|       | Locus_22028_Transcript_1/1_Confidence_0.000_Length_297    |
| CYP81 | Locus_3183_Transcript_2/23_Confidence_0.032_Length_473    |
|       | Locus_6868_Transcript_3/14_Confidence_0.333_Length_492    |
|       | Locus_6868_Transcript_2/14_Confidence_0.400_Length_525    |
|       | Locus_6868_Transcript_1/14_Confidence_0.467_Length_850    |
|       | Locus_2612_Transcript_4/4_Confidence_0.000_Length_1036    |
|       | Locus_2612_Transcript_3/4_Confidence_0.333_Length_1908    |
|       | Locus_1752_Transcript_1/7_Confidence_0.111_Length_1903    |
|       | Locus_1752_Transcript_2/7_Confidence_0.111_Length_2104    |
|       | Locus_11470_Transcript_3/4_Confidence_0.571_Length_1398   |
|       | Locus_24190_Transcript_1/1_Confidence_0.000_Length_1129   |
|       | Locus_11470_Transcript_2/4_Confidence_0.429_Length_1398   |
|       | Locus_11470_Transcript_4/4_Confidence_0.000_Length_1398   |
|       | Locus_7159_Transcript_5/7_Confidence_0.667_Length_1917    |
|       | Locus_7159_Transcript_6/7_Confidence_0.500_Length_1917    |
|       | Locus_7159_Transcript_4/7_Confidence_0.250_Length_1327    |
|       | Locus_11470_Transcript_1/4_Confidence_0.286_Length_270    |
|       | Locus_7159_Transcript_2/7_Confidence_0.500_Length_1195    |
|       | Locus_7159_Transcript_3/7_Confidence_0.417_Length_1204    |
|       | Locus_7159_Transcript_1/7_Confidence_0.500_Length_1172    |

|       |                                                          |
|-------|----------------------------------------------------------|
|       | Locus_1500_Transcript_8/8_Confidence_0.429_Length_2594   |
|       | Locus_1752_Transcript_6/7_Confidence_0.333_Length_1763   |
|       | Locus_1752_Transcript_5/7_Confidence_0.444_Length_1767   |
|       | Locus_1752_Transcript_3/7_Confidence_0.444_Length_3510   |
|       | Locus_12542_Transcript_1/9_Confidence_0.500_Length_580   |
| CYP82 | Locus_10475_Transcript_2/11_Confidence_0.188_Length_1306 |
|       | Locus_10475_Transcript_3/11_Confidence_0.062_Length_1602 |
|       | Locus_2006_Transcript_6/27_Confidence_0.283_Length_1221  |
|       | Locus_2006_Transcript_8/27_Confidence_0.264_Length_1352  |
|       | Locus_17484_Transcript_1/1_Confidence_0.000_Length_678   |
|       | Locus_2006_Transcript_16/27_Confidence_0.057_Length_380  |
|       | Locus_2006_Transcript_3/27_Confidence_0.189_Length_737   |
|       | Locus_2616_Transcript_5/5_Confidence_0.000_Length_1077   |
|       | Locus_2616_Transcript_4/5_Confidence_0.375_Length_1917   |
|       | Locus_2616_Transcript_1/5_Confidence_0.625_Length_1907   |
|       | Locus_2616_Transcript_3/5_Confidence_0.250_Length_1851   |
|       | Locus_2616_Transcript_2/5_Confidence_0.375_Length_1915   |
|       | Locus_2006_Transcript_12/27_Confidence_0.113_Length_628  |
|       | Locus_2006_Transcript_10/27_Confidence_0.226_Length_832  |
|       | Locus_2006_Transcript_11/27_Confidence_0.189_Length_672  |
|       | Locus_2096_Transcript_1/9_Confidence_0.182_Length_1978   |
|       | Locus_2096_Transcript_2/9_Confidence_0.091_Length_1980   |
|       | Locus_2006_Transcript_25/27_Confidence_0.321_Length_1534 |
|       | Locus_2006_Transcript_26/27_Confidence_0.226_Length_1571 |
|       | Locus_2006_Transcript_19/27_Confidence_0.396_Length_1572 |
|       | Locus_2006_Transcript_22/27_Confidence_0.358_Length_1572 |
|       | Locus_2006_Transcript_18/27_Confidence_0.396_Length_1565 |
|       | Locus_2006_Transcript_23/27_Confidence_0.396_Length_1641 |
|       | Locus_2006_Transcript_21/27_Confidence_0.396_Length_1659 |
|       | Locus_2006_Transcript_27/27_Confidence_0.113_Length_622  |

|              |                                                          |
|--------------|----------------------------------------------------------|
|              | Locus_2006_Transcript_4/27_Confidence_0.302_Length_1221  |
|              | Locus_2006_Transcript_2/27_Confidence_0.321_Length_1308  |
|              | Locus_16804_Transcript_1/1_Confidence_0.000_Length_905   |
|              | Locus_2006_Transcript_20/27_Confidence_0.340_Length_1572 |
|              | Locus_1496_Transcript_5/16_Confidence_0.625_Length_1627  |
|              | Locus_1496_Transcript_13/16_Confidence_0.583_Length_1641 |
|              | Locus_1496_Transcript_11/16_Confidence_0.625_Length_1641 |
|              | Locus_1496_Transcript_6/16_Confidence_0.542_Length_1627  |
|              | Locus_1496_Transcript_12/16_Confidence_0.500_Length_1641 |
|              | Locus_1496_Transcript_8/16_Confidence_0.625_Length_1695  |
|              | Locus_1496_Transcript_14/16_Confidence_0.542_Length_1709 |
|              | Locus_1496_Transcript_10/16_Confidence_0.542_Length_1811 |
|              | Locus_1496_Transcript_7/16_Confidence_0.625_Length_1626  |
|              | Locus_1496_Transcript_15/16_Confidence_0.333_Length_1640 |
|              | Locus_1496_Transcript_9/16_Confidence_0.583_Length_1575  |
|              | Locus_1496_Transcript_16/16_Confidence_0.000_Length_395  |
|              | Locus_1496_Transcript_3/16_Confidence_0.542_Length_1610  |
|              | Locus_1496_Transcript_4/16_Confidence_0.417_Length_1195  |
|              | Locus_1496_Transcript_1/16_Confidence_0.167_Length_828   |
|              | Locus_1496_Transcript_2/16_Confidence_0.042_Length_500   |
|              | Locus_2006_Transcript_5/27_Confidence_0.302_Length_1222  |
| <b>CYP83</b> | Locus_3026_Transcript_71/74_Confidence_0.050_Length_1496 |
|              | Locus_3026_Transcript_67/74_Confidence_0.135_Length_2218 |
|              | Locus_3026_Transcript_62/74_Confidence_0.135_Length_2050 |
|              | Locus_13963_Transcript_5/5_Confidence_0.000_Length_1807  |
|              | Locus_13963_Transcript_4/5_Confidence_0.500_Length_1808  |
|              | Locus_13963_Transcript_1/5_Confidence_0.667_Length_1809  |
|              | Locus_13963_Transcript_3/5_Confidence_0.583_Length_1809  |
|              | Locus_13963_Transcript_2/5_Confidence_0.583_Length_1762  |
|              | Locus_2658_Transcript_36/69_Confidence_0.082_Length_1040 |

|              |                                                           |
|--------------|-----------------------------------------------------------|
|              | Locus_2658_Transcript_45/69_Confidence_0.111_Length_1318  |
|              | Locus_2658_Transcript_46/69_Confidence_0.064_Length_1329  |
|              | Locus_2658_Transcript_40/69_Confidence_0.082_Length_1401  |
|              | Locus_2658_Transcript_42/69_Confidence_0.111_Length_1401  |
|              | Locus_3026_Transcript_2/74_Confidence_0.064_Length_1006   |
|              | Locus_2658_Transcript_6/69_Confidence_0.058_Length_424    |
|              | Locus_37046_Transcript_1/1_Confidence_0.833_Length_338    |
| <b>CYP84</b> | Locus_19681_Transcript_1/1_Confidence_0.000_Length_1840   |
|              | Locus_11698_Transcript_1/1_Confidence_0.000_Length_841    |
|              | Locus_17506_Transcript_1/1_Confidence_0.000_Length_401    |
| <b>CYP85</b> | Locus_25051_Transcript_1/1_Confidence_0.000_Length_246    |
| <b>CYP86</b> | Locus_2860_Transcript_4/16_Confidence_0.273_Length_758    |
|              | Locus_19470_Transcript_1/1_Confidence_0.000_Length_901    |
| <b>CYP87</b> | Locus_11181_Transcript_10/17_Confidence_0.130_Length_381  |
|              | Locus_11181_Transcript_13/17_Confidence_0.174_Length_1410 |
|              | Locus_11181_Transcript_12/17_Confidence_0.174_Length_1415 |
|              | Locus_11181_Transcript_11/17_Confidence_0.174_Length_1410 |
|              | Locus_11181_Transcript_14/17_Confidence_0.130_Length_1372 |
|              | Locus_11181_Transcript_15/17_Confidence_0.043_Length_1338 |
| <b>CYP88</b> | Locus_6215_Transcript_5/5_Confidence_0.000_Length_1741    |
|              | Locus_6215_Transcript_4/5_Confidence_0.125_Length_2038    |
| <b>CYP89</b> | Locus_2860_Transcript_5/16_Confidence_0.273_Length_726    |
|              | Locus_2860_Transcript_6/16_Confidence_0.273_Length_812    |
|              | Locus_2860_Transcript_7/16_Confidence_0.318_Length_904    |
|              | Locus_2860_Transcript_15/16_Confidence_0.273_Length_828   |
|              | Locus_2860_Transcript_8/16_Confidence_0.545_Length_1268   |
|              | Locus_2860_Transcript_11/16_Confidence_0.318_Length_1035  |
|              | Locus_2860_Transcript_13/16_Confidence_0.500_Length_1358  |
|              | Locus_2860_Transcript_10/16_Confidence_0.500_Length_1354  |
|              | Locus_2860_Transcript_16/16_Confidence_0.227_Length_1370  |

|       |                                                          |
|-------|----------------------------------------------------------|
|       | Locus_2860_Transcript_14/16_Confidence_0.545_Length_1446 |
|       | Locus_2860_Transcript_9/16_Confidence_0.636_Length_1462  |
|       | Locus_2860_Transcript_12/16_Confidence_0.500_Length_1444 |
|       | Locus_3183_Transcript_18/23_Confidence_0.419_Length_1290 |
|       | Locus_10238_Transcript_1/1_Confidence_0.333_Length_1883  |
|       | Locus_16923_Transcript_3/4_Confidence_0.400_Length_1016  |
|       | Locus_16923_Transcript_1/4_Confidence_0.400_Length_852   |
|       | Locus_16923_Transcript_2/4_Confidence_0.200_Length_955   |
|       | Locus_10856_Transcript_3/7_Confidence_0.091_Length_628   |
|       | Locus_4058_Transcript_7/12_Confidence_0.143_Length_555   |
| CYP90 | Locus_296_Transcript_2/14_Confidence_0.200_Length_789    |
|       | Locus_296_Transcript_3/14_Confidence_0.333_Length_1223   |
|       | Locus_296_Transcript_14/14_Confidence_0.100_Length_1314  |
|       | Locus_296_Transcript_10/14_Confidence_0.300_Length_2127  |
|       | Locus_296_Transcript_13/14_Confidence_0.233_Length_2259  |
|       | Locus_296_Transcript_11/14_Confidence_0.367_Length_2384  |
|       | Locus_296_Transcript_7/14_Confidence_0.467_Length_2388   |
|       | Locus_296_Transcript_8/14_Confidence_0.433_Length_2415   |
|       | Locus_296_Transcript_9/14_Confidence_0.300_Length_1930   |
|       | Locus_296_Transcript_12/14_Confidence_0.100_Length_2867  |
|       | Locus_16943_Transcript_1/1_Confidence_0.000_Length_2055  |
|       | Locus_2919_Transcript_6/8_Confidence_0.200_Length_1003   |
|       | Locus_2919_Transcript_3/8_Confidence_0.400_Length_1573   |
|       | Locus_7472_Transcript_3/3_Confidence_0.000_Length_846    |
|       | Locus_7472_Transcript_1/3_Confidence_0.400_Length_2057   |
|       | Locus_7472_Transcript_2/3_Confidence_0.000_Length_1334   |
|       | Locus_21810_Transcript_1/1_Confidence_0.000_Length_535   |
|       | Locus_26673_Transcript_1/1_Confidence_0.000_Length_238   |
|       | Locus_9617_Transcript_5/6_Confidence_0.571_Length_1910   |
|       | Locus_9617_Transcript_4/6_Confidence_0.571_Length_1919   |

|              |                                                          |
|--------------|----------------------------------------------------------|
|              | Locus_9617_Transcript_3/6_Confidence_0.571_Length_2005   |
|              | Locus_9617_Transcript_1/6_Confidence_0.714_Length_2014   |
|              | Locus_9617_Transcript_6/6_Confidence_0.143_Length_2014   |
|              | Locus_9617_Transcript_2/6_Confidence_0.714_Length_2109   |
| <b>CYP94</b> | Locus_2871_Transcript_1/2_Confidence_0.750_Length_1863   |
|              | Locus_2871_Transcript_2/2_Confidence_0.250_Length_1867   |
|              | Locus_2424_Transcript_1/1_Confidence_0.000_Length_1734   |
| <b>CYP96</b> | Locus_2163_Transcript_3/11_Confidence_0.346_Length_520   |
|              | Locus_3183_Transcript_3/23_Confidence_0.323_Length_874   |
|              | Locus_3183_Transcript_4/23_Confidence_0.387_Length_879   |
|              | Locus_3183_Transcript_7/23_Confidence_0.452_Length_1677  |
|              | Locus_3183_Transcript_8/23_Confidence_0.516_Length_1682  |
|              | Locus_3183_Transcript_6/23_Confidence_0.387_Length_1020  |
|              | Locus_3183_Transcript_5/23_Confidence_0.452_Length_1025  |
|              | Locus_3183_Transcript_17/23_Confidence_0.452_Length_1117 |
|              | Locus_3183_Transcript_19/23_Confidence_0.452_Length_1113 |
|              | Locus_3183_Transcript_9/23_Confidence_0.581_Length_1828  |
|              | Locus_3183_Transcript_13/23_Confidence_0.581_Length_1920 |
|              | Locus_3183_Transcript_16/23_Confidence_0.516_Length_1878 |
|              | Locus_3183_Transcript_15/23_Confidence_0.548_Length_1990 |
|              | Locus_3183_Transcript_20/23_Confidence_0.581_Length_2078 |
|              | Locus_3183_Transcript_21/23_Confidence_0.419_Length_1275 |
|              | Locus_3183_Transcript_22/23_Confidence_0.581_Length_2081 |
|              | Locus_3183_Transcript_23/23_Confidence_0.290_Length_1288 |
|              | Locus_11035_Transcript_1/1_Confidence_0.000_Length_1723  |
|              | Locus_21546_Transcript_1/1_Confidence_0.000_Length_1236  |
|              | Locus_30147_Transcript_1/1_Confidence_0.000_Length_300   |
|              | Locus_12542_Transcript_7/9_Confidence_0.333_Length_577   |
| <b>CYP97</b> | Locus_6410_Transcript_12/23_Confidence_0.370_Length_2302 |
|              | Locus_6410_Transcript_7/23_Confidence_0.407_Length_2315  |

|              |                                                          |
|--------------|----------------------------------------------------------|
|              | Locus_6410_Transcript_10/23_Confidence_0.407_Length_2320 |
|              | Locus_6410_Transcript_13/23_Confidence_0.407_Length_2349 |
|              | Locus_6410_Transcript_14/23_Confidence_0.407_Length_2422 |
|              | Locus_6410_Transcript_15/23_Confidence_0.556_Length_4023 |
|              | Locus_6410_Transcript_16/23_Confidence_0.593_Length_4842 |
|              | Locus_6410_Transcript_18/23_Confidence_0.556_Length_4938 |
|              | Locus_6410_Transcript_3/23_Confidence_0.111_Length_928   |
|              | Locus_6410_Transcript_5/23_Confidence_0.111_Length_928   |
|              | Locus_6410_Transcript_4/23_Confidence_0.111_Length_933   |
|              | Locus_6410_Transcript_6/23_Confidence_0.222_Length_1366  |
|              | Locus_6410_Transcript_20/23_Confidence_0.593_Length_4735 |
|              | Locus_6410_Transcript_21/23_Confidence_0.556_Length_4876 |
|              | Locus_6410_Transcript_2/23_Confidence_0.148_Length_625   |
|              | Locus_9437_Transcript_4/8_Confidence_0.538_Length_2054   |
|              | Locus_9437_Transcript_8/8_Confidence_0.154_Length_2219   |
|              | Locus_9437_Transcript_7/8_Confidence_0.692_Length_2201   |
|              | Locus_9437_Transcript_2/8_Confidence_0.538_Length_2553   |
|              | Locus_9437_Transcript_1/8_Confidence_0.308_Length_1777   |
|              | Locus_5217_Transcript_4/6_Confidence_0.222_Length_823    |
|              | Locus_5217_Transcript_5/6_Confidence_0.222_Length_827    |
|              | Locus_5217_Transcript_1/6_Confidence_0.667_Length_1286   |
|              | Locus_5217_Transcript_2/6_Confidence_0.667_Length_1290   |
|              | Locus_5217_Transcript_6/6_Confidence_0.111_Length_1187   |
|              | Locus_5217_Transcript_3/6_Confidence_0.444_Length_1361   |
|              | Locus_15204_Transcript_2/2_Confidence_0.400_Length_995   |
|              | Locus_15204_Transcript_1/2_Confidence_0.800_Length_757   |
|              | Locus_6410_Transcript_22/23_Confidence_0.370_Length_4847 |
| <b>CYP98</b> | Locus_5966_Transcript_4/8_Confidence_0.333_Length_881    |
|              | Locus_5966_Transcript_3/8_Confidence_0.389_Length_884    |
|              | Locus_5966_Transcript_5/8_Confidence_0.389_Length_1106   |

|        |                                                         |
|--------|---------------------------------------------------------|
|        | Locus_5966_Transcript_2/8_Confidence_0.389_Length_1805  |
|        | Locus_5966_Transcript_1/8_Confidence_0.389_Length_1808  |
|        | Locus_5966_Transcript_6/8_Confidence_0.389_Length_1808  |
|        | Locus_5966_Transcript_8/8_Confidence_0.056_Length_1768  |
|        | Locus_5966_Transcript_7/8_Confidence_0.111_Length_1065  |
|        | Locus_19973_Transcript_1/1_Confidence_0.000_Length_1735 |
| CYP702 | Locus_22762_Transcript_3/5_Confidence_0.143_Length_696  |
|        | Locus_22762_Transcript_5/5_Confidence_0.000_Length_1642 |
|        | Locus_22762_Transcript_2/5_Confidence_0.571_Length_1702 |
|        | Locus_11181_Transcript_8/17_Confidence_0.217_Length_376 |
|        | Locus_11181_Transcript_9/17_Confidence_0.217_Length_363 |
| CYP704 | Locus_21790_Transcript_1/3_Confidence_0.750_Length_416  |
|        | Locus_21790_Transcript_2/3_Confidence_0.500_Length_509  |
| CYP705 | Locus_2163_Transcript_7/11_Confidence_0.538_Length_1351 |
|        | Locus_2163_Transcript_8/11_Confidence_0.538_Length_1693 |
|        | Locus_2163_Transcript_11/11_Confidence_0.154_Length_678 |
|        | Locus_28508_Transcript_1/1_Confidence_0.000_Length_300  |
|        | Locus_3897_Transcript_2/3_Confidence_0.625_Length_792   |
|        | Locus_3897_Transcript_3/3_Confidence_0.500_Length_912   |
|        | Locus_3897_Transcript_1/3_Confidence_0.625_Length_922   |
|        | Locus_6868_Transcript_5/14_Confidence_0.200_Length_287  |
|        | Locus_5093_Transcript_4/4_Confidence_0.000_Length_680   |
|        | Locus_17870_Transcript_2/3_Confidence_0.200_Length_1007 |
| CYP706 | Locus_9265_Transcript_3/3_Confidence_0.167_Length_360   |
|        | Locus_9265_Transcript_2/3_Confidence_0.500_Length_466   |
|        | Locus_9265_Transcript_1/3_Confidence_0.333_Length_466   |
|        | Locus_22720_Transcript_1/1_Confidence_0.000_Length_304  |
|        | Locus_1182_Transcript_2/17_Confidence_0.516_Length_1813 |
|        | Locus_1182_Transcript_3/17_Confidence_0.484_Length_1813 |
|        | Locus_1182_Transcript_1/17_Confidence_0.516_Length_1817 |



|        |                                                          |
|--------|----------------------------------------------------------|
|        | Locus_1182_Transcript_4/17_Confidence_0.516_Length_1813  |
|        | Locus_1182_Transcript_11/17_Confidence_0.452_Length_1872 |
|        | Locus_1182_Transcript_8/17_Confidence_0.548_Length_1872  |
|        | Locus_1182_Transcript_13/17_Confidence_0.516_Length_1872 |
|        | Locus_1182_Transcript_12/17_Confidence_0.516_Length_1909 |
|        | Locus_1182_Transcript_14/17_Confidence_0.484_Length_1909 |
|        | Locus_1182_Transcript_7/17_Confidence_0.484_Length_1870  |
|        | Locus_1182_Transcript_10/17_Confidence_0.484_Length_1852 |
|        | Locus_1182_Transcript_6/17_Confidence_0.581_Length_1909  |
|        | Locus_1182_Transcript_15/17_Confidence_0.484_Length_1929 |
|        | Locus_1182_Transcript_5/17_Confidence_0.581_Length_1969  |
|        | Locus_1182_Transcript_9/17_Confidence_0.613_Length_2028  |
|        | Locus_18372_Transcript_1/1_Confidence_0.000_Length_284   |
|        | Locus_14353_Transcript_1/1_Confidence_0.000_Length_1114  |
|        | Locus_15761_Transcript_1/1_Confidence_0.000_Length_1304  |
|        | Locus_1182_Transcript_16/17_Confidence_0.226_Length_866  |
|        | Locus_12215_Transcript_6/8_Confidence_0.500_Length_2092  |
|        | Locus_12215_Transcript_7/8_Confidence_0.250_Length_2079  |
|        | Locus_12215_Transcript_8/8_Confidence_0.083_Length_1862  |
|        | Locus_28066_Transcript_1/1_Confidence_0.000_Length_559   |
| CYP707 | Locus_1174_Transcript_1/1_Confidence_0.000_Length_1127   |
|        | Locus_12634_Transcript_1/1_Confidence_0.000_Length_1613  |
| CYP708 | Locus_11181_Transcript_17/17_Confidence_0.000_Length_513 |
|        | Locus_5093_Transcript_1/4_Confidence_0.600_Length_457    |
| CYP709 | Locus_10475_Transcript_4/11_Confidence_0.312_Length_909  |
|        | Locus_10475_Transcript_8/11_Confidence_0.438_Length_2605 |
| CYP712 | Locus_6868_Transcript_4/14_Confidence_0.400_Length_671   |
|        | Locus_16293_Transcript_1/1_Confidence_0.000_Length_1727  |
| CYP714 | Locus_10475_Transcript_6/11_Confidence_0.438_Length_2115 |
| CYP716 | Locus_6034_Transcript_2/15_Confidence_0.120_Length_502   |

|               |                                                           |
|---------------|-----------------------------------------------------------|
|               | Locus_25282_Transcript_1/1_Confidence_0.000_Length_1460   |
|               | Locus_7923_Transcript_2/4_Confidence_0.333_Length_1584    |
|               | Locus_7923_Transcript_1/4_Confidence_0.444_Length_1589    |
|               | Locus_7923_Transcript_3/4_Confidence_0.667_Length_1593    |
|               | Locus_7923_Transcript_4/4_Confidence_0.333_Length_1655    |
|               | Locus_22920_Transcript_1/1_Confidence_0.000_Length_236    |
|               | Locus_28257_Transcript_1/1_Confidence_0.000_Length_364    |
|               | Locus_24538_Transcript_1/1_Confidence_0.000_Length_786    |
|               | Locus_18277_Transcript_1/1_Confidence_0.000_Length_293    |
|               | Locus_6034_Transcript_9/15_Confidence_0.200_Length_706    |
|               | Locus_6034_Transcript_1/15_Confidence_0.360_Length_1151   |
|               | Locus_6034_Transcript_3/15_Confidence_0.320_Length_1151   |
|               | Locus_6034_Transcript_13/15_Confidence_0.360_Length_1496  |
|               | Locus_6034_Transcript_5/15_Confidence_0.400_Length_1811   |
|               | Locus_6034_Transcript_15/15_Confidence_0.040_Length_831   |
| <b>CYP721</b> | Locus_10475_Transcript_1/11_Confidence_0.250_Length_749   |
|               | Locus_10475_Transcript_11/11_Confidence_0.000_Length_1062 |
| <b>CYP722</b> | Locus_6868_Transcript_9/14_Confidence_0.467_Length_1899   |
| <b>CYP734</b> | Locus_2860_Transcript_2/16_Confidence_0.227_Length_535    |
|               | Locus_3941_Transcript_5/6_Confidence_0.222_Length_1272    |
|               | Locus_3941_Transcript_1/6_Confidence_0.667_Length_1619    |
|               | Locus_3941_Transcript_3/6_Confidence_0.556_Length_1774    |
|               | Locus_3941_Transcript_2/6_Confidence_0.444_Length_669     |
|               | Locus_3941_Transcript_4/6_Confidence_0.111_Length_1852    |
|               | Locus_3941_Transcript_3/6_Confidence_0.556_Length_1774    |
|               | Locus_3941_Transcript_2/6_Confidence_0.444_Length_669     |
| <b>CYP735</b> | Locus_20269_Transcript_1/1_Confidence_0.000_Length_720    |
|               | Locus_3780_Transcript_9/13_Confidence_0.462_Length_1358   |
|               | Locus_3780_Transcript_7/13_Confidence_0.500_Length_1389   |
|               | Locus_3780_Transcript_2/13_Confidence_0.462_Length_1291   |

|  |                                                                 |
|--|-----------------------------------------------------------------|
|  | <b>Locus_3780_Transcript_8/13_Confidence_0.577_Length_1997</b>  |
|  | <b>Locus_3780_Transcript_1/13_Confidence_0.269_Length_1024</b>  |
|  | <b>Locus_3780_Transcript_10/13_Confidence_0.115_Length_1666</b> |
|  | <b>Locus_3780_Transcript_5/13_Confidence_0.231_Length_879</b>   |
|  | <b>Locus_3780_Transcript_4/13_Confidence_0.231_Length_878</b>   |
|  | <b>Locus_3780_Transcript_3/13_Confidence_0.269_Length_1519</b>  |
|  | <b>Locus_3780_Transcript_6/13_Confidence_0.269_Length_1568</b>  |

**Table S6b: Putative nomenclature of identified *M. koenigii* full length genes encoding Cytochrome P450 using different public databases**

| Transcript ID                                                 | Nelson database/<br><a href="http://blast.uthsc.edu/blast.cgi">http://blast.uthsc.edu/blast.cgi</a> | Bio catnet CYPED v6.0/<br><a href="https://cyped.biocatnet.de/workbench/blast">https://cyped.biocatnet.de/workbench/blast</a> | NCBI                                                                    | TAIR                                                                       |
|---------------------------------------------------------------|-----------------------------------------------------------------------------------------------------|-------------------------------------------------------------------------------------------------------------------------------|-------------------------------------------------------------------------|----------------------------------------------------------------------------|
| <b>Locus_7540_Transcript_1/1_Confidence_0.000_Length_1583</b> | CYP51G1/CYP51A2                                                                                     | Cyp51/PREDICTED: sterol 14-demethylase-like                                                                                   | PREDICTED: obtusifoliol 14-alpha demethylase [ <i>Citrus sinensis</i> ] | putative obtusifoliol 14-alpha demethylase involved in sterol biosynthesis |
| <b>Locus_2312_Transcript_4/9_Confidence_0.417_Length_2270</b> | CYP71B34                                                                                            | PREDICTED: cytochrome P450 71B37-like cytochrome P450                                                                         | PREDICTED: cytochrome P450 71B34-like [ <i>Citrus sinensis</i> ]        | CYP71B2/secondary metabolite biosynthetic process                          |
| <b>Locus_2312_Transcript_3/9_Confidence_0.458_Length_2289</b> | CYP71B34                                                                                            | PREDICTED: cytochrome P450 71B37-like cytochrome P450                                                                         | PREDICTED: cytochrome P450 71B34-like [ <i>Citrus sinensis</i> ]        | CYP71B2/secondary metabolite biosynthetic process                          |
| <b>Locus_2312_Transcript_1/9_Confidence_0.458_Length_2300</b> | CYP71B34                                                                                            | PREDICTED: cytochrome P450 71B37-like cytochrome P450                                                                         | PREDICTED: cytochrome P450 71B34-like [ <i>Citrus sinensis</i> ]        | CYP71B2/secondary metabolite biosynthetic process                          |

|                                                                |          |                                                |                                                                  |                                                                                                                                                                                                                                                                                                                                                                                        |
|----------------------------------------------------------------|----------|------------------------------------------------|------------------------------------------------------------------|----------------------------------------------------------------------------------------------------------------------------------------------------------------------------------------------------------------------------------------------------------------------------------------------------------------------------------------------------------------------------------------|
| <b>Locus_11455_Transcript_1/1_Confidence_0.000_Length_1818</b> | CYP71B35 | hypothetical protein                           | PREDICTED: cytochrome P450 71A1-like [ <i>Citrus sinensis</i> ]  | CYP71B22                                                                                                                                                                                                                                                                                                                                                                               |
| <b>Locus_9283_Transcript_1/2_Confidence_0.333_Length_1824</b>  | CYP721   | PREDICTED: cytochrome P450 734A1-like          | PREDICTED: cytochrome P450 734A1-like [ <i>Citrus sinensis</i> ] | CYP721A1                                                                                                                                                                                                                                                                                                                                                                               |
| <b>Locus_2093_Transcript_4/5_Confidence_0.333_Length_2108</b>  | CYP74B2  | hydroperoxide lyase [ <i>Citrus jambhiri</i> ] | fatty acid hydroperoxide lyase [ <i>Citrus sinensis</i> ]        | CYP74B2, HPL1, HYDROPEROXIDE LYASE 1/sterol metabolic process                                                                                                                                                                                                                                                                                                                          |
| <b>Locus_11826_Transcript_1/4_Confidence_0.714_Length_2049</b> | CYP74A   | CYP74A                                         | allene oxide synthase [ <i>Citrus sinensis</i> ]                 | ALLENE OXIDE SYNTHASE, AOS, CYP74A, CYTOCHROME P450 74A, DDE2, DELAYED DEHISCENCE 2/defense response, defense response to fungus, epoxy genase P450 pathway, jasmonic acid biosynthetic process, oxidation-reduction process, oxylipin biosynthetic process, oxylipin metabolic process, response to fungus, response to jasmonic acid, response to wounding, sterol metabolic process |
| <b>Locus_11826_Transcript_4/4_Confidence_0.143_Length_2049</b> | CYP74A   | CYP74A                                         | allene oxide synthase [ <i>Citrus sinensis</i> ]                 | ALLENE OXIDE SYNTHASE, AOS, CYP74A, CYTOCHROME P450 74A, DDE2, DELAYED DEHISCENCE 2/defense response, defense response to fungus, epoxy genase P450 pathway, jasmonic acid biosynthetic process, oxidation-reduction process, oxylipin biosynthetic process, oxylipin metabolic process, response to fungus, response to jasmonic acid, response to wounding, sterol metabolic process |

|                                                                |         |                           |                                                                 |                                                                                                                                                                                                                                                                                                                                                                                        |
|----------------------------------------------------------------|---------|---------------------------|-----------------------------------------------------------------|----------------------------------------------------------------------------------------------------------------------------------------------------------------------------------------------------------------------------------------------------------------------------------------------------------------------------------------------------------------------------------------|
| <b>Locus_11826_Transcript_2/4_Confidence_0.714_Length_2061</b> | CYP74A  | CYP74A                    | allene oxide synthase<br>[ <i>Citrus sinensis</i> ]             | ALLENE OXIDE SYNTHASE, AOS, CYP74A, CYTOCHROME P450 74A, DDE2, DELAYED DEHISCENCE 2/defense response, defense response to fungus, epoxy genase P450 pathway, jasmonic acid biosynthetic process, oxidation-reduction process, oxylipin biosynthetic process, oxylipin metabolic process, response to fungus, response to jasmonic acid, response to wounding, sterol metabolic process |
| <b>Locus_11826_Transcript_3/4_Confidence_0.429_Length_1919</b> | CYP74A  | CYP74A                    | allene oxide synthase<br>[ <i>Citrus sinensis</i> ]             | ALLENE OXIDE SYNTHASE, AOS, CYP74A, CYTOCHROME P450 74A, DDE2, DELAYED DEHISCENCE 2/defense response, defense response to fungus, epoxy genase P450 pathway, jasmonic acid biosynthetic process, oxidation-reduction process, oxylipin biosynthetic process, oxylipin metabolic process, response to fungus, response to jasmonic acid, response to wounding, sterol metabolic process |
| <b>Locus_16409_Transcript_3/4_Confidence_0.500_Length_1727</b> | CYP75B1 | cytochrome P450 71A1-like | PREDICTED: cytochrome P450 71A1-like [ <i>Citrus sinensis</i> ] | CYP81H1/defense response to other organism, indole glucosinolate metabolic process, oxidation-reduction process, secondary metabolite biosynthetic process OR CYP71B16/secondary metabolite biosynthetic process                                                                                                                                                                       |
| <b>Locus_16409_Transcript_1/4_Confidence_0.750_Length_1728</b> | CYP75B1 | cytochrome P450 71A1-like | PREDICTED: cytochrome P450 71A1-like [ <i>Citrus sinensis</i> ] | CYP81H1/defense response to other organism, indole glucosinolate metabolic process, oxidation-reduction process, secondary metabolite biosynthetic process OR CYP71B16/secondary metabolite biosynthetic process                                                                                                                                                                       |

|                                                                 |         |                                           |                                                                                   |                                                                                                                                                                                                                  |
|-----------------------------------------------------------------|---------|-------------------------------------------|-----------------------------------------------------------------------------------|------------------------------------------------------------------------------------------------------------------------------------------------------------------------------------------------------------------|
| <b>Locus_16409_Transcript_4/4_Confidence_0.000_Length_1652</b>  | CYP75B1 | cytochrome P450 71A1-like                 | PREDICTED: cytochrome P450 71A1-like [ <i>Citrus sinensis</i> ]                   | CYP81H1/defense response to other organism, indole glucosinolate metabolic process, oxidation-reduction process, secondary metabolite biosynthetic process OR CYP71B16/secondary metabolite biosynthetic process |
| <b>Locus_16409_Transcript_2/4_Confidence_0.250_Length_1653</b>  | CYP75B1 | cytochrome P450 71A1-like                 | PREDICTED: cytochrome P450 71A1-like [ <i>Citrus sinensis</i> ]                   | CYP81H1/defense response to other organism, indole glucosinolate metabolic process, oxidation-reduction process, secondary metabolite biosynthetic process OR CYP71B16/secondary metabolite biosynthetic process |
| <b>Locus_11745_Transcript_2/2_Confidence_0.000_Length_1803</b>  | CYP75B1 | PREDICTED: flavonoid 3-monooxygenase-like | PREDICTED: flavonoid 3-monooxygenase [ <i>Citrus sinensis</i> ]                   | CYP75B1, CYTOCHROME P450 75B1, D501, TRANSPARENT TESTA 7, TT7/flavonoid biosynthetic process, oxidation-reduction process, response to UV, response to auxin, secondary metabolite biosynthetic process          |
| <b>Locus_13518_Transcript_1/2_Confidence_0.750_Length_1779</b>  | CYP76C4 | CYP76B                                    | PREDICTED: geraniol 8-hydroxylase-like isoform X3 [ <i>Citrus sinensis</i> ]      | CYP71B20/defense response to other organism, oxidation-reduction process, secondary metabolite biosynthetic process                                                                                              |
| <b>Locus_10475_Transcript_5/11_Confidence_0.500_Length_2157</b> | CYP78A9 | cytochrome P450 78A9-like isoform         | PREDICTED: cytochrome P450 3A31-like isoform X1 [ <i>Citrus sinensis</i> ]        | CCT2, PHOSPHORYLCHOLINE CYTIDYLTRANSFERASE2                                                                                                                                                                      |
| <b>Locus_5093_Transcript_3/4_Confidence_0.400_Length_2576</b>   | CYP79B3 | NADPH--cytochrome P450 reductase          | PREDICTED: NADPH--cytochrome P450 reductase isoform X1 [ <i>Citrus sinensis</i> ] | P450 REDUCTASE 2/phenylpropanoid general pathway                                                                                                                                                                 |
| <b>Locus_5093_Transcript_2/4_Confidence_0.600_Length_2353</b>   | CYP79B3 | NADPH--cytochrome P450 reductase          | PREDICTED: NADPH--cytochrome P450 reductase isoform X1 [ <i>Citrus sinensis</i> ] | P450 REDUCTASE 2/phenylpropanoid general pathway                                                                                                                                                                 |

|                                                               |         |                                                 |                                                                                |                                                                                                                                                            |
|---------------------------------------------------------------|---------|-------------------------------------------------|--------------------------------------------------------------------------------|------------------------------------------------------------------------------------------------------------------------------------------------------------|
| <b>Locus_2612_Transcript_3/4_Confidence_0.333_Length_1908</b> | CYP81K2 | CYP81K                                          | PREDICTED: cytochrome P450 81D11-like [ <i>Citrus sinensis</i> ]               | CYP81K2/defense response to other organism, indole glucosinolate metabolic process, oxidation-reduction process, secondary metabolite biosynthetic process |
| <b>Locus_1752_Transcript_1/7_Confidence_0.111_Length_1903</b> | CYP81D8 | cytochrome P450 81D1-like                       | PREDICTED: isoflavone 3'-hydroxyase-like [ <i>Citrus sinensis</i> ]            | CYP81D5/defense response to other organism, indole glucosinolate metabolic process, oxidation-reduction process, secondary metabolite biosynthetic process |
| <b>Locus_1752_Transcript_2/7_Confidence_0.111_Length_2104</b> | CYP81D8 | cytochrome P450 81D1-like                       | PREDICTED: isoflavone 3'-hydroxyase-like [ <i>Citrus sinensis</i> ]            | CYP81D5/defense response to other organism, indole glucosinolate metabolic process, oxidation-reduction process, secondary metabolite biosynthetic process |
| <b>Locus_1752_Transcript_6/7_Confidence_0.333_Length_1763</b> | CYP81D8 | CYP81E                                          | PREDICTED: isoflavone 2'-hydroxyase-like isoform X1 [ <i>Citrus sinensis</i> ] | CYP81D5/defense response to other organism, indole glucosinolate metabolic process, oxidation-reduction process, secondary metabolite biosynthetic process |
| <b>Locus_1752_Transcript_5/7_Confidence_0.444_Length_1767</b> | CYP81D8 | isoflavone 2'-hydroxyase-like isoform X1/CYP81E | PREDICTED: isoflavone 2'-hydroxyase-like isoform X1 [ <i>Citrus sinensis</i> ] | CYP81D5/defense response to other organism, indole glucosinolate metabolic process, oxidation-reduction process, secondary metabolite biosynthetic process |
| <b>Locus_2616_Transcript_4/5_Confidence_0.375_Length_1917</b> | CYP82C4 | CYP82G                                          | PREDICTED: cytochrome P450 82C4-like [ <i>Ziziphus jujuba</i> ]                | CYP82C4/cellular response to iron ion, oxidation-reduction process, secondary metabolite biosynthetic process                                              |
| <b>Locus_2616_Transcript_1/5_Confidence_0.625_Length_1907</b> | CYP82C4 | CYP82G                                          | PREDICTED: cytochrome P450 82C4-like [ <i>Ziziphus jujuba</i> ]                | CYP82C4/cellular response to iron ion, oxidation-reduction process, secondary metabolite biosynthetic process                                              |

|                                                                 |               |                           |                                                                     |                                                                                                                                                                                           |
|-----------------------------------------------------------------|---------------|---------------------------|---------------------------------------------------------------------|-------------------------------------------------------------------------------------------------------------------------------------------------------------------------------------------|
| <b>Locus_2616_Transcript_3/5_Confidence_0.250_Length_1851</b>   | CYP82C4       | CYP82G                    | PREDICTED: cytochrome P450 82C4-like [ <i>Ziziphus jujuba</i> ]     | CYP82C4/cellular response to iron ion, oxidation-reduction process, secondary metabolite biosynthetic process                                                                             |
| <b>Locus_2616_Transcript_2/5_Confidence_0.375_Length_1915</b>   | CYP82C4       | CYP82G                    | PREDICTED: cytochrome P450 82C4-like [ <i>Ziziphus jujuba</i> ]     | CYP82C4/cellular response to iron ion, oxidation-reduction process, secondary metabolite biosynthetic process                                                                             |
| <b>Locus_2096_Transcript_1/9_Confidence_0.182_Length_1978</b>   | CYP82C4       | cytochrome P450 82C4-like | PREDICTED: cytochrome P450 CYP82D47-like [ <i>Citrus sinensis</i> ] | CYP82C3/oxidation-reduction process, secondary metabolite biosynthetic process                                                                                                            |
| <b>Locus_2096_Transcript_2/9_Confidence_0.091_Length_1980</b>   | CYP82C4       | cytochrome P450 82C4-like | PREDICTED: cytochrome P450 CYP82D47-like [ <i>Citrus sinensis</i> ] | CYP82C3/oxidation-reduction process, secondary metabolite biosynthetic process                                                                                                            |
| <b>Locus_2006_Transcript_25/27_Confidence_0.321_Length_1534</b> | CYP82C4/C2/C3 | cytochrome P450 82C4-like | cytochrome P450 82A3-like isoform X2 [ <i>Citrus sinensis</i> ]     | CYP71B37                                                                                                                                                                                  |
| <b>Locus_3026_Transcript_71/74_Confidence_0.050_Length_1496</b> | CYP83A2       | CYP83B                    | PREDICTED: cytochrome P450 83B1-like [ <i>Citrus sinensis</i> ]     | CYP71B5/ cellular response to ethylene stimulus, cellular response to iron ion, cellular response to nitric oxide, oxidation-reduction process, secondary metabolite biosynthetic process |
| <b>Locus_3026_Transcript_67/74_Confidence_0.135_Length_2218</b> | CYP83A2       | CYP83B                    | PREDICTED: cytochrome P450 83B1-like [ <i>Citrus sinensis</i> ]     | CYP71B5/ cellular response to ethylene stimulus, cellular response to iron ion, cellular response to nitric oxide, oxidation-reduction process, secondary metabolite biosynthetic process |
| <b>Locus_3026_Transcript_62/74_Confidence_0.135_Length_2050</b> | CYP83A2       | CYP83B                    | PREDICTED: cytochrome P450 83B1-like [ <i>Citrus sinensis</i> ]     | CYP71B5/ cellular response to ethylene stimulus, cellular response to iron ion, cellular response to nitric oxide, oxidation-reduction process, secondary metabolite biosynthetic process |



|                                                                |         |                                                            |                                                                                             |                                                                                                                                                                                                                                                                                                                                                                                                                             |
|----------------------------------------------------------------|---------|------------------------------------------------------------|---------------------------------------------------------------------------------------------|-----------------------------------------------------------------------------------------------------------------------------------------------------------------------------------------------------------------------------------------------------------------------------------------------------------------------------------------------------------------------------------------------------------------------------|
|                                                                |         |                                                            |                                                                                             | process                                                                                                                                                                                                                                                                                                                                                                                                                     |
| <b>Locus_19681_Transcript_1/1_Confidence_0.000_Length_1840</b> | CYP84A1 | CYP84A                                                     | PREDICTED: cytochrome P450 84A1 [ <i>Citrus sinensis</i> ]                                  | CYP84A1, CYTOCHROME P450 84A1, FAH1, FERULIC ACID 5-HYDROXYLASE 1/lignin biosynthetic process, oxidation-reduction process, phenylpropanoid biosynthetic process, response to UV-B                                                                                                                                                                                                                                          |
| <b>Locus_10238_Transcript_1/1_Confidence_0.333_Length_1883</b> | CYP89A5 | PREDICTED: cytochrome P450 89A2-like                       | PREDICTED: cytochrome P450 89A2-like [ <i>Citrus sinensis</i> ]                             | CYP89A3/ oxidation-reduction process, secondary metabolite biosynthetic process                                                                                                                                                                                                                                                                                                                                             |
| <b>Locus_7472_Transcript_1/3_Confidence_0.400_Length_2057</b>  | CYP90C1 | 3-epi-6-deoxocathasterone 23-monooxygenase-like isoform X1 | PREDICTED: 3-epi-6-deoxocathasterone 23-monooxygenase isoform X1 [ <i>Citrus sinensis</i> ] | CYP90B1, DWARF 4, DWF4, PARTIALLY SUPPRESSING CO11 INSENSITIVITY TO JA 1, PSC1, SAV1, SHADE AVOIDANCE 1, SNP2, SUPPRESSOR OF NPH4 2/ brassinosteroid biosynthetic process, brassinosteroid homeostasis, jasmonic acid mediated signaling pathway, leaf development, leaf shaping, oxidation-reduction process, response to brassinosteroid, response to jasmonic acid, sterol metabolic process, unidimensional cell growth |

|                                                                      |                |               |                                                                                       |                                                                                                                                                                                                                                                                                                                                                                                                                                                                                                                                                                                                                       |
|----------------------------------------------------------------------|----------------|---------------|---------------------------------------------------------------------------------------|-----------------------------------------------------------------------------------------------------------------------------------------------------------------------------------------------------------------------------------------------------------------------------------------------------------------------------------------------------------------------------------------------------------------------------------------------------------------------------------------------------------------------------------------------------------------------------------------------------------------------|
| <p><b>Locus_9617_Transcript_5/6_Confidence_0.571_Length_1910</b></p> | <p>CYP90D1</p> | <p>CYP90D</p> | <p>PREDICTED: 3-epi-6-deoxocathasterone 23-monooxygenase [<i>Citrus sinensis</i>]</p> | <p>CYP90D1/Encodes a cytochrome P-450 gene that is involved in brassinosteroid biosynthesis, most likely in the conversion step of teasterone (TE) to 3-dehydroteasterone (3DT), and/or 6-deoxoteasterone (6-deoxoTE) to 6-deoxo-3-dehydroteasterone (6-deoxo3DT); or the conversion of cathasterone (CT) to TE, and/or 6-deoxocathasterone (6-deoxoCT) to 6-deoxoTE. Recently, CYP90D1 was shown to catalyse the C-23 hydroxylation of several brassinosteroids (the enzyme has a broad specificity for 22-hydroxylated substrates). Member of the CYP90C CYP450 family. Similar to Cytochrome P450 90C1 (ROT3).</p> |
| <p><b>Locus_9617_Transcript_4/6_Confidence_0.571_Length_1919</b></p> | <p>CYP90D1</p> | <p>CYP90D</p> | <p>PREDICTED: 3-epi-6-deoxocathasterone 23-monooxygenase [<i>Citrus sinensis</i>]</p> | <p>CYP90D1/Encodes a cytochrome P-450 gene that is involved in brassinosteroid biosynthesis, most likely in the conversion step of teasterone (TE) to 3-dehydroteasterone (3DT), and/or 6-deoxoteasterone (6-deoxoTE) to 6-deoxo-3-dehydroteasterone (6-deoxo3DT); or the conversion of cathasterone (CT) to TE, and/or 6-deoxocathasterone (6-deoxoCT) to 6-deoxoTE. Recently, CYP90D1 was shown to catalyse the C-23 hydroxylation of several brassinosteroids (the enzyme has a broad specificity for 22-hydroxylated substrates). Member of the CYP90C CYP450 family. Similar to Cytochrome P450 90C1 (ROT3).</p> |

|                                                               |         |                                      |                                                                                  |                                                                                                                                                                                                                                                                                                                                                                                                                                                                                                                                                                                                                |
|---------------------------------------------------------------|---------|--------------------------------------|----------------------------------------------------------------------------------|----------------------------------------------------------------------------------------------------------------------------------------------------------------------------------------------------------------------------------------------------------------------------------------------------------------------------------------------------------------------------------------------------------------------------------------------------------------------------------------------------------------------------------------------------------------------------------------------------------------|
| <b>Locus_9617_Transcript_3/6_Confidence_0.571_Length_2005</b> | CYP90D1 | CYP90D                               | PREDICTED: 3-epi-6-deoxocathasterone 23-monooxygenase [ <i>Citrus sinensis</i> ] | CYP90D1/Encodes a cytochrome P-450 gene that is involved in brassinosteroid biosynthesis, most likely in the conversion step of teasterone (TE) to 3-dehydroteasterone (3DT), and/or 6-deoxoteasterone (6-deoxoTE) to 6-deoxo-3-dehydroteasterone (6-deoxo3DT); or the conversion of cathasterone (CT) to TE, and/or 6-deoxocathasterone (6-deoxoCT) to 6-deoxoTE. Recently, CYP90D1 was shown to catalyse the C-23 hydroxylation of several brassinosteroids (the enzyme has a broad specificity for 22-hydroxylated substrates). Member of the CYP90C CYP450 family. Similar to Cytochrome P450 90C1 (ROT3). |
| <b>Locus_9617_Transcript_1/6_Confidence_0.714_Length_2014</b> | CYP90D1 | CYP90D                               | PREDICTED: 3-epi-6-deoxocathasterone 23-monooxygenase [ <i>Citrus sinensis</i> ] | CYP90D1/Encodes a cytochrome P-450 gene that is involved in brassinosteroid biosynthesis, most likely in the conversion step of teasterone (TE) to 3-dehydroteasterone (3DT), and/or 6-deoxoteasterone (6-deoxoTE) to 6-deoxo-3-dehydroteasterone (6-deoxo3DT); or the conversion of cathasterone (CT) to TE, and/or 6-deoxocathasterone (6-deoxoCT) to 6-deoxoTE. Recently, CYP90D1 was shown to catalyse the C-23 hydroxylation of several brassinosteroids (the enzyme has a broad specificity for 22-hydroxylated substrates). Member of the CYP90C CYP450 family. Similar to Cytochrome P450 90C1 (ROT3). |
| <b>Locus_2871_Transcript_1/2_Confidence_0.750_Length_1863</b> | CYP94D2 | PREDICTED: cytochrome P450 94A1-like | PREDICTED: cytochrome P450 94A1-like [ <i>Citrus sinensis</i> ]                  | CYP94B1/CYP86C1                                                                                                                                                                                                                                                                                                                                                                                                                                                                                                                                                                                                |

|                                                                 |          |                                      |                                                                                                           |                                                                                                                                  |
|-----------------------------------------------------------------|----------|--------------------------------------|-----------------------------------------------------------------------------------------------------------|----------------------------------------------------------------------------------------------------------------------------------|
| <b>Locus_2871_Transcript_2/2_Confidence_0.250_Length_1867</b>   | CYP94D2  | PREDICTED: cytochrome P450 94A1-like | PREDICTED: cytochrome P450 94A1-like [ <i>Citrus sinensis</i> ]                                           | CYP94B1/CYP86C1                                                                                                                  |
| <b>Locus_2424_Transcript_1/1_Confidence_0.000_Length_1734</b>   | CYP94D2  | PREDICTED: cytochrome P450 94A1-like | PREDICTED: cytochrome P450 94A1-like [ <i>Citrus sinensis</i> ]                                           | CYP94B1/CYP86C1                                                                                                                  |
| <b>Locus_3183_Transcript_7/23_Confidence_0.452_Length_1677</b>  | CYP96A10 | -                                    | PREDICTED: peptidyl-prolyl cis-trans isomerase CYP37, chloroplastic isoform X1 [ <i>Citrus sinensis</i> ] | Cyclophilin-like peptidyl-prolyl cis-trans isomerase family protein                                                              |
| <b>Locus_11035_Transcript_1/1_Confidence_0.000_Length_1723</b>  | CYP96A10 | CYP86B                               | PREDICTED: alkane hydroxylase MAH1 [ <i>Vitis vinifera</i> ]                                              | CYP96A9/CYP96A8                                                                                                                  |
| <b>Locus_6410_Transcript_15/23_Confidence_0.556_Length_4023</b> | CYP97A3  | CYP97B                               | cytochrome P450 [ <i>Citrus unshiu</i> ]                                                                  | CYP97A3, LUT5, LUTEIN DEFICIENT 5/carotenoid biosynthetic process, oxidation-reduction process, xanthophyll biosynthetic process |
| <b>Locus_6410_Transcript_16/23_Confidence_0.593_Length_4842</b> | CYP97A3  | CYP97B                               | cytochrome P450 [ <i>Citrus unshiu</i> ]                                                                  | CYP97A3, LUT5, LUTEIN DEFICIENT 5/carotenoid biosynthetic process, oxidation-reduction process, xanthophyll biosynthetic process |
| <b>Locus_6410_Transcript_20/23_Confidence_0.593_Length_4735</b> | CYP97A3  | CYP97B                               | cytochrome P450 [ <i>Citrus unshiu</i> ]                                                                  | CYP97A3, LUT5, LUTEIN DEFICIENT 5/carotenoid biosynthetic process, oxidation-reduction process, xanthophyll biosynthetic process |
| <b>Locus_6410_Transcript_21/23_Confidence_0.556_Length_4876</b> | CYP97A3  | CYP97B                               | cytochrome P450 [ <i>Citrus unshiu</i> ]                                                                  | CYP97A3, LUT5, LUTEIN DEFICIENT 5/carotenoid biosynthetic process, oxidation-reduction process, xanthophyll biosynthetic process |

|                                                                |                   |                                      |                                                                                                                                                 |                                                                                                                                                                                                                                              |
|----------------------------------------------------------------|-------------------|--------------------------------------|-------------------------------------------------------------------------------------------------------------------------------------------------|----------------------------------------------------------------------------------------------------------------------------------------------------------------------------------------------------------------------------------------------|
| <b>Locus_19973_Transcript_1/1_Confidence_0.000_Length_1735</b> | CYP98A3           | PREDICTED: cytochrome P450 98A2-like | PREDICTED: cytochrome P450 98A2 [ <i>Citrus sinensis</i> ]/p-coumaryl-CoA 3'-hydroxylase [ <i>Populus alba</i> x <i>Populus grandidentata</i> ] | CYP98A3/encodes coumarate 3-hydroxylase (C3H), a P450-dependent monooxygenase. coumarin biosynthetic process, flavonoid biosynthetic process, lignin biosynthetic process, oxidation-reduction process, phenylpropanoid biosynthetic process |
| <b>Locus_22762_Transcript_5/5_Confidence_0.000_Length_1642</b> | CYP702A6/A5/A1/A2 | CYP702A6                             | PREDICTED: cytochrome P450 708A2-like [ <i>Camelina sativa</i> ]                                                                                | CYP702A6/A5/A1/A2 involved in brassinosteroid biosynthetic process, brassinosteroid homeostasis, multicellular organism development, oxidation-reduction process, sterol metabolic process                                                   |
| <b>Locus_22762_Transcript_2/5_Confidence_0.571_Length_1702</b> | CYP702A6/A5/A1/A2 | CYP702A6                             | PREDICTED: cytochrome P450 708A2-like [ <i>Camelina sativa</i> ]                                                                                | CYP702A6/A5/A1/A2 involved in brassinosteroid biosynthetic process, brassinosteroid homeostasis, multicellular organism development, oxidation-reduction process, sterol metabolic process                                                   |
| <b>Locus_15761_Transcript_1/1_Confidence_0.000_Length_1304</b> | CYP706A4          | -                                    | PREDICTED: 8-hydroxygeraniol dehydrogenase-like [ <i>Citrus sinensis</i> ]                                                                      | CAD6/CAD6                                                                                                                                                                                                                                    |
| <b>Locus_12215_Transcript_6/8_Confidence_0.500_Length_2092</b> | CYP706A4          | CYP706A                              | PREDICTED: geraniol 8-hydroxylase [ <i>Ricinus communis</i> ]                                                                                   | CYP706A4/oxidation-reduction process, secondary metabolite biosynthetic process                                                                                                                                                              |
| <b>Locus_12215_Transcript_7/8_Confidence_0.250_Length_2079</b> | CYP706A4          | CYP706A                              | PREDICTED: geraniol 8-hydroxylase [ <i>Ricinus communis</i> ]                                                                                   | CYP706A4/oxidation-reduction process, secondary metabolite biosynthetic process                                                                                                                                                              |
| <b>Locus_12215_Transcript_8/8_Confidence_0.083_Length_1862</b> | CYP706A4          | CYP706A                              | PREDICTED: geraniol 8-hydroxylase [ <i>Ricinus communis</i> ]                                                                                   | CYP706A4/oxidation-reduction process, secondary metabolite biosynthetic process                                                                                                                                                              |

|                                                                 |                           |                                                       |                                                                                 |                                                                                                                                                                                                                                                  |
|-----------------------------------------------------------------|---------------------------|-------------------------------------------------------|---------------------------------------------------------------------------------|--------------------------------------------------------------------------------------------------------------------------------------------------------------------------------------------------------------------------------------------------|
| <b>Locus_12634_Transcript_1/1_Confidence_0.000_Length_1613</b>  | CYP707A4                  | CYP707A/abscisic acid 8'-hydroxylase 3-like precursor | abscisic acid 8'-hydroxylase 3-like precursor [ <i>Citrus sinensis</i> ]        | CYP707A4/ ABA 8'-hydroxylase activity, involved in abscisic acid catabolic process, brassinosteroid biosynthetic process, brassinosteroid homeostasis, multicellular organism development, oxidation-reduction process, sterol metabolic process |
| <b>Locus_10475_Transcript_8/11_Confidence_0.438_Length_2605</b> | CYP709B2                  | cytochrome P450 78A9-like isoform X3                  | PREDICTED: cytochrome P450 4C1-like isoform X3 [ <i>Citrus sinensis</i> ]       | CCT2, PHOSPHORYLCHOLINE CYTIDYLYLTRANSFERASE2                                                                                                                                                                                                    |
| <b>Locus_16293_Transcript_1/1_Confidence_0.000_Length_1727</b>  | CYP712A1                  | PREDICTED: cytochrome P450 93A1-like                  | PREDICTED: 3,9-dihydroxypterocarp an 6A-monoxygenase [ <i>Citrus sinensis</i> ] | CYP712A1/ oxidation-reduction process, secondary metabolite biosynthetic process                                                                                                                                                                 |
| <b>Locus_10475_Transcript_6/11_Confidence_0.438_Length_2115</b> | CYP714A1                  | cytochrome P450 78A9-like isoform X1                  | PREDICTED: cytochrome P450 3A31-like isoform X1 [ <i>Citrus sinensis</i> ]      | CCT2, PHOSPHORYLCHOLINE CYTIDYLYLTRANSFERASE2                                                                                                                                                                                                    |
| <b>Locus_3941_Transcript_3/6_Confidence_0.556_Length_1774</b>   | CYP734A1 old name CYP72B1 | PREDICTED: cytochrome P450 734A1-like                 | PREDICTED: cytochrome P450 CYP749A22-like [ <i>Citrus sinensis</i> ]            | DUF2                                                                                                                                                                                                                                             |
| <b>Locus_3941_Transcript_3/6_Confidence_0.556_Length_1774</b>   | CYP734A1 old name CYP72B2 | PREDICTED: cytochrome P450 734A1-like                 | PREDICTED: cytochrome P450 CYP749A22-like [ <i>Citrus sinensis</i> ]            | DUF2                                                                                                                                                                                                                                             |

**Table S7: Localization prediction of MkTPSs using different software tools**

|               | <b>ChlorpP</b> | <b>WoLF PSORT</b>   | <b>Predotar</b>  | <b>TargetP</b> |
|---------------|----------------|---------------------|------------------|----------------|
| <b>MkTPS1</b> | Chloroplast    | Chloroplast         | Plastid          | Chloroplast    |
| <b>MkTPS2</b> | none           | cytosol             | None             | none           |
| <b>MkTPS3</b> | Chloroplast    | Chloroplast         | possibly plastid | Chloroplast    |
| <b>MkTPS4</b> | Chloroplast    | Chloroplast         | possibly plastid | Chloroplast    |
| <b>MkTPS5</b> | none           | cytosol             | None             | none           |
| <b>MkTPS6</b> | none           | cytosol/nucleus     | None             | none           |
| <b>MkTPS7</b> | Chloroplast    | cytosol/chloroplast | None             | none           |

**Table S8: Identity and similarity score matrix of MkTPS1 and MkTPS2 with characterized A) Sabinene synthases and B)  $\alpha$ -Farnesene synthases**

| A  | Other characterized Sabinene synthases                  | MkTPS1        |
|----|---------------------------------------------------------|---------------|
| 1  | RlemTPS2                                                | I- 80%, S-87% |
| 2  | SoSS                                                    | I- 43%, S-62% |
| 3  | HcMTPS7                                                 | I- 41%, S-60% |
| 4  | PsSS                                                    | I- 31%, S-47% |
| 5  | TpSS                                                    | I- 29%, S-51% |
| B  | Other characterized $\alpha$ -Farnesene synthases (AFS) | MkTPS2        |
| 1  | VvAFS                                                   | I- 54%, S-71% |
| 2  | CmAFS                                                   | I- 46%, S-56% |
| 3  | CsAFS/BOCS                                              | I- 45%, S-64% |
| 4  | VvAFS/BOCS                                              | I- 38%, S-56% |
| 5  | RcAFS                                                   | I- 35%, S-55% |
| 6  | OfTPS4                                                  | I- 36%, S-53% |
| 7  | AtAFS/BOCS                                              | I- 35%, S-55% |
| 8  | MdAFS1/BOCS                                             | I- 35%, S-54% |
| 9  | PaAFS                                                   | I- 33%, S-53% |
| 10 | PtAFS                                                   | I- 32%, S-51% |
| 11 | PgXeTPS/bocs                                            | I- 32%, S-52% |
| 12 | AdAFS/bocs                                              | I- 26%, S-47% |



**Table S9. List of primers used in the study**

| Name        | Sequence (5'-3')                | Use                              |
|-------------|---------------------------------|----------------------------------|
| MKTPS1 F1   | GCATATGGCTACTACTAAGCCTGCC       | pet32a(+) cloning forward primer |
| MKTPS1 R1   | CGCGGCCGCTGGAATGGGATCAAAAATAAAG | pet32a(+) cloning reverse primer |
| MKTPS1 F2   | GTCTAGAATGGCTCTCAATCTGCTCTCTTC  | GFP cloning forward vector       |
| MKTPS1 R2   | CGGATCCGGCATAACGATTCTCCCTTATA   | GFP cloning reverse primer       |
| MKTPS1 F3   | CGCACATTAGTGAACCAT              | internal sequencing              |
| MKTPS1 F4   | CTTATGGACCGTGGGGGATATATTCG      | internal sequencing              |
| MKTPS1 R3   | CCCCACGGTCCATAAGAAATTCTC        | internal sequencing              |
| MKTPS2 F1   | GCATATGTCTTTACAAGTTTCAGCCTC     | pet32a(+) cloning forward primer |
| MKTPS2 R1   | CGCGGCCGCTATCGGCACAGGATTAATAAGC | pet32a(+) cloning reverse primer |
| MKTPS2 F2   | GTCTAGAATGTCTTTACAAGTTTCAGCCTC  | GFP cloning forward vector       |
| MKTPS2 R2   | CGGATCCTGCATCAATCAATTCAAGTGCAT  | GFP cloning reverse primer       |
| MKTPS2 R3   | CGGATCCTATCGGCACACCATTAATAAGC   | internal sequencing              |
| MKActin F   | GTCAGGGACATGAAGGAAAAGC          | Endogenous control for qPCR      |
| MKActin R   | TCTTGGAGGTCTCAAGCTCTTGT         | Endogenous control for qPCR      |
| MKF-BOX F   | TCGCCACTGGGTTTGATGAT            | Endogenous control for qPCR      |
| MKF-BOX R   | AACAAGGAACGCGGGAAGCTT           | Endogenous control for qPCR      |
| MKTPS1 RT F | TGGAGGATGCGAAGATTGG             | TPS1 qPCR primer                 |
| MKTPS1 RTR  | CATGTCCGGTCCACTTTCGT            | TPS1 qPCR primer                 |
| MKTPS2 RTF  | CCAAGTGTGTGCCAATGC              | TPS2 qPCR primer                 |
| MKTPS2 RTR  | GACATCTGCAACGCGTGTAAG           | TPS2 qPCR primer                 |

## References:

1. Ito, C., Thoyama, Y., Omura, M., Kajiura, I. & Furukawa, H. Alkaloidal Constituents of *Murraya koenigii*. Isolation and structural elucidation of novel binary carbazolequinones and carbazole alkaloids. *Chem. Pharm. Bull.* **41**, 2096-2100 (1993).
2. Chowdhury, B. K., Jha, S., Bhattacharyya, P. & Mukherjee, J. Two new carbazole alkaloids from *Murraya koenigii*. *Ind. J. Chem.* **40B**, 490-494 (2001).
3. Adebajo, A. C. *et al.* Evaluation of the ethnomedical claims of *Murraya koenigii*. *Pharm. Biol.* **42**, 610-620 (2005).
4. Rahman, M. M. & Gray, A. I. A benzofuran derivative and carbazole alkaloids from *Murraya koenigii* and their antimicrobial activity. *Phytochemistry* **66**, 1601-1606 (2005).
5. Chakrabarty, M. *et al.* Carbazole alkaloids from *Murraya koenigii*. *Phytochemistry* **46**, 751-755 (1997)
6. Wang, Y. S., He, H. P., Shen, Y. M., Hong, X. & Hao, X. J. Two new carbazole alkaloids from *Murraya koenigii*. *J. Nat. Prod.* **66**, 416-418 (2003).
7. Kureel, S. P., Kapil, R. S. & Popli, S. P. Two novel alkaloids from *Murraya koenigii* spreng: mahanimbicine and bicyclomahanimbicine. *Chem. Ind.* **18**, 958 (1970).
8. Ganesan, P., Phaiphon, A., Murugan, Y. & Baharin, B.S. Comparative study of bioactive compounds in curry and coriander leaves: An update. *J. chem. pharm. res.* **5**, 590-594 (2013).

9. Naz, S., Saied, S., Ahmed, A. & Shahid, S. M. Three new carbazole alkaloids and biological activities of *Murraya koenigii*. *J. Asian Nat. Prod. Res.* **17**, 7-13 (2015).
10. Uvarani, C. *et al.* Axially chiral biscarbazoles and biological evaluation of the constituents from *Murraya koenigii*. *Fitoterapia.* **94**, 10-20 (2014).
11. Tachibana, Y., Kikuzaki, H., Lajis, N. H. & Nakatani, N. Antioxidative activity of carbazoles from *Murraya koenigii* leaves. *J. Agric. Food Chem.* **49**, 5589-5594 (2001).
12. Takeya, K., Itoigawa, M. & Furukawa, H. Triphasic inotropic response of guinea-pig papillary muscle to murrayaquinone-A isolated from Rutaceae. *Eur. J. Pharmacol.* **169**, 137-145 (1989).
13. Tantapakul, C., Phakhodee, W., Laphookhieo, S., Ritthiwigrom, T. & Cheenpracha, S. Cytotoxic carbazole alkaloids from the stems of *Murraya koenigii*. *Chem. Nat. Comp.* **50**, 186-188 (2014).
14. Reisch, J., Adebajo, A. C., Kumar, V. & Aladesanmi, A. J. Two carbazole alkaloids from *Murraya koenigii*. *Phytochemistry* **36**, 1073-1076 (1994).
15. Adebajo, A. C. *et al.* Anti-trichomonal, biochemical and toxicological activities of methanolic extract and some carbazole alkaloids isolated from the leaves of *Murraya koenigii* growing in Nigeria. *Phytomed.* **13**, 246-254 (2006).
16. Roy, M. K., Thalang, V. N., Trakoontivakorn, G. & Nakahara, K. Mechanism of mahenine-induced apoptosis in human leukemia cell (HL-60). *Biochem. Pharmacol.* **67**, 41-51 (2004).

17. Kok, Y. Y. *et al.* Anti-tumour promoting activity and antioxidant properties of girinimbine isolated from the stem bark of *Murraya koenigii* S. *Molecules*. **17**, 4651-4660 (2012).
18. Reisch, J., Goj, O., Wickramasinghe, A., Herath, H. M. T. B. & Henkel, G. Carbazole alkaloids from seeds of *Murraya koenigii*. *Phytochemistry* **31**, 2877-2879 (1992).
19. Ito, C. *et al.* Induction of apoptosis by carbazole alkaloids isolated from *Murraya koenigii*. *Phytomed*. **13b**, 359-365 (2006).
20. Rehman, F., Khan, M. F., Khan, I., Shareef, H. & Marwat, S. K. Analgesic Activity of Carbazole Alkaloid from *Murraya paniculata* Linn. (Rutaceae). *American-Eurasian J. Agric. & Environ. Sci.* **14**, 240-245 (2014).
21. Bhattacharya, L., Roy, S. K. & Chakrovorty, D. P. Structure of the carbazole alkaloid isomurrayazoline from *Murraya koenigii*. *Phytochemistry* **21**, 2432-2433 (1982).
22. Handral, H. K., Pandith, A. & Shruthi S. D. A Review on *Murraya Koenigii*: Multipotent medicinal plant. *Asian J. Pharm. Clin. Res.* **5**, 5-14 (2012).
23. Nakamura, S. *et al.* Alkaloids from Sri Lankan curry-leaf (*Murraya koenigii*) display melanogenesis inhibitory activity: structures of karapinchamines A and B. *Bioorg. Med. Chem.* **21**, 1043-1049 (2013).
24. Rao, L. J. M., Ramalakshmi, K., Borse, B. B. & Raghavan, B. Antioxidant and radical-scavenging carbazole alkaloids from the oleoresin of curry leaf (*Murraya koenigii* Spreng.). *Food Chem.* **100**, 742-747 (2007).
25. Joshi, B. S., Kamat, V. N. & Gawad, D. H. On the structures of girinimbine, mahanimbine, isomahanimbine, koenimbidine and murrayacine. *Tetrahedron*. **26**, 1475-1482 (1970).

26. Patel, O. P. *et al.* Naturally Occurring Carbazole Alkaloids from *Murraya koenigii* as Potential Antidiabetic Agents. *J. Nat. Prod.* [Epub ahead of print] (2016)
27. Mandal, S. *et al.* Antidiarrhoeal activity of carbazole alkaloids from *Murraya koenigii* Spreng (Rutaceae) seeds. *Fitoterapia* **81**, 72–74 (2010).
28. Nalli, Y. *et al.* Four new carbazole alkaloids from *Murraya koenigii* that display anti-inflammatory and anti-microbial activities. *Org. Biomol. Chem.* **14**, 3322-3332 (2016).
29. Fiebig, M., Pezzuto, J. M., Soejarto, D. D. & Kinghorn, A. D. Koenoline, a further cytotoxic carbazole alkaloid from *Murraya koenigii*. *Phytochemistry* **24**, 3041-3043 (1985).
30. Nagappan, T., Segaran, T. C., Wahid, M. E., Ramasamy, P. & Vairappan, C. S. Efficacy of carbazole alkaloids, essential oil and extract of *Murraya koenigii* in enhancing subcutaneous wound healing in rats. *Molecules* **17**, 14449-14463 (2012).
31. Dineshkumar, B., Mitra, A. & Mahadevappa, M. Antidiabetic and hypolipidemic effects of mahanimbine (carbazole alkaloid) from *Murraya koenigii* (Rutaceae) leaves. *Int. J. Phytomed.* **2**, 22-30 (2010).
32. Bhattacharyya, P. & Chakraborty, A. Mukonal, a probable biogenetic intermediate of pyranocarbazole alkaloids from *Murraya koenigii*. *Phytochemistry* **23**, 471-472 (1984).
33. Sunthitikawinsakul, A. *et al.* Coumarins and carbazoles from *Clausena excavata* exhibited antimycobacterial and antifungal activities. *Planta Med.* **69**, 155-157 (2003).

34. Choudhury, B. K. & Chakraborty, D. P. Mukoeic acid, the first carbazole carboxylic acid from a plant source. *Phytochemistry* **10**, 1967-1970 (1971).
35. Ishikura, M., Abe, T., Choshi, T. & Hibino, S. Simple indole alkaloids and those with a non-rearranged monoterpene unit. *Nat. Prod. Rep.* **30**, 694-752 (2013).
36. Mukherjee, M. Mukherjee, S., Shaw, A. K. & Ganguly, S. N. Mukonicine, a carbazole alkaloid from leaves of *Murraya koenigii*. *Phytochemistry* (1983).
37. Chakraborty, D. P., Barman, B. K. & Bose, P. K. On the constitution of murrayanine, a carbazole derivative isolated from *Murraya koenigii* Spreng. *Tetrahedron* **21**, 681-685 (1965).
38. Priya, R. M., Blessed, B. P. & Nija, S. Chemical composition, antibacterial and antioxidant profile of essential oil from *Murraya koenigii* (L.) leaves. *Avicenna J. Phytomed.* **4**, 200-214 (2014).
39. Ramsewak, R. S., Nair, M. G., Strasburg, G. M., DeWitt, D. L. & Nitiss, J. L. Biologically active carbazole alkaloids from *Murraya koenigii*. *J. Agric. Food Chem.* **47**, 444-447 (1999).
40. Itoigawa, M. *et al.* Antitumor agents. Carbazole alkaloid murrayaquinone A and related synthetic carbazolequinones as cytotoxic agents. *J. Nat. Prod.* **63**, 893-897 (2000).
41. Ahmad, K., Tan, S. P., Hazni, H. & Nafiah, M. A. Cyclic monoterpene pyranocarbazole alkaloids from the bark of *Murraya koenigii* (L.) Spreng. *Jurnal Teknologi.* **77**, 73-77 (2015).
42. Adebajo, A. C. & Reisch, J. Minor furocoumarins of *Murraya koenigii*. *Fitoterapia* **71**, 334-337 (2000).

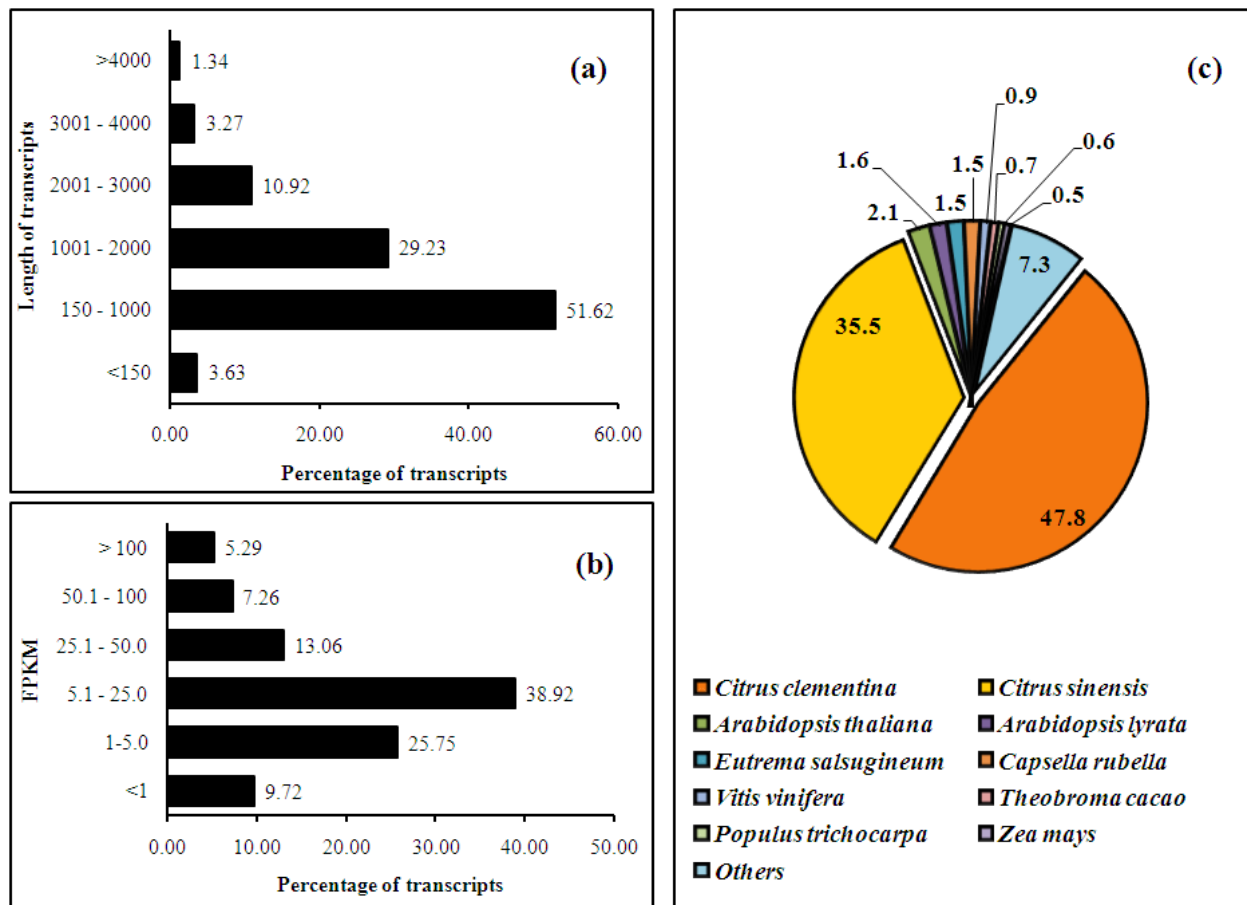

**Figure S1.** a) Length distribution of total assembled transcripts in *M. koenigii*, b) FPKM distribution of assembled transcripts with length  $\geq 150$  bp, c) Organismal distribution of *M. koenigii* transcripts annotated according to NCBI BLASTX top hits.

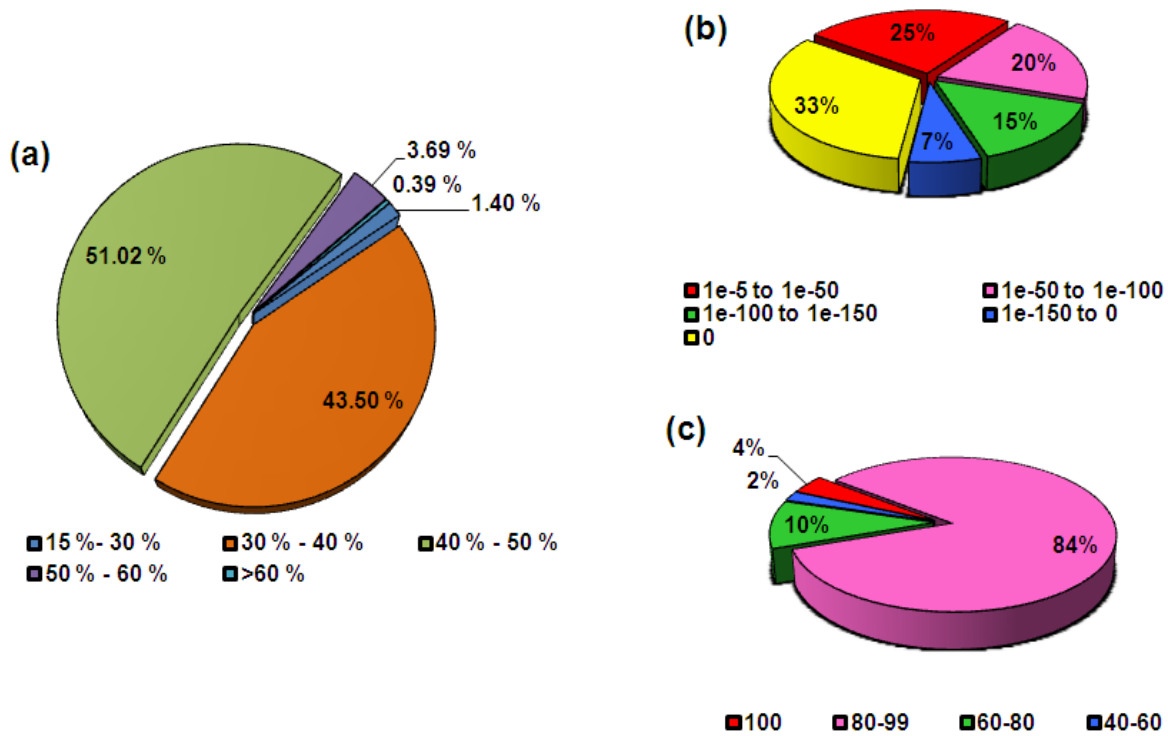

**Figure S2.** a) GC % distribution of assembled transcripts with length  $\geq 150$ bp, b) E-value distribution of assembled transcripts with length  $\geq 150$ bp and FPKM  $\geq 1$ , balstx against NCBI nr database and (c) Similarity score distribution of blastx results against NCBI nr database



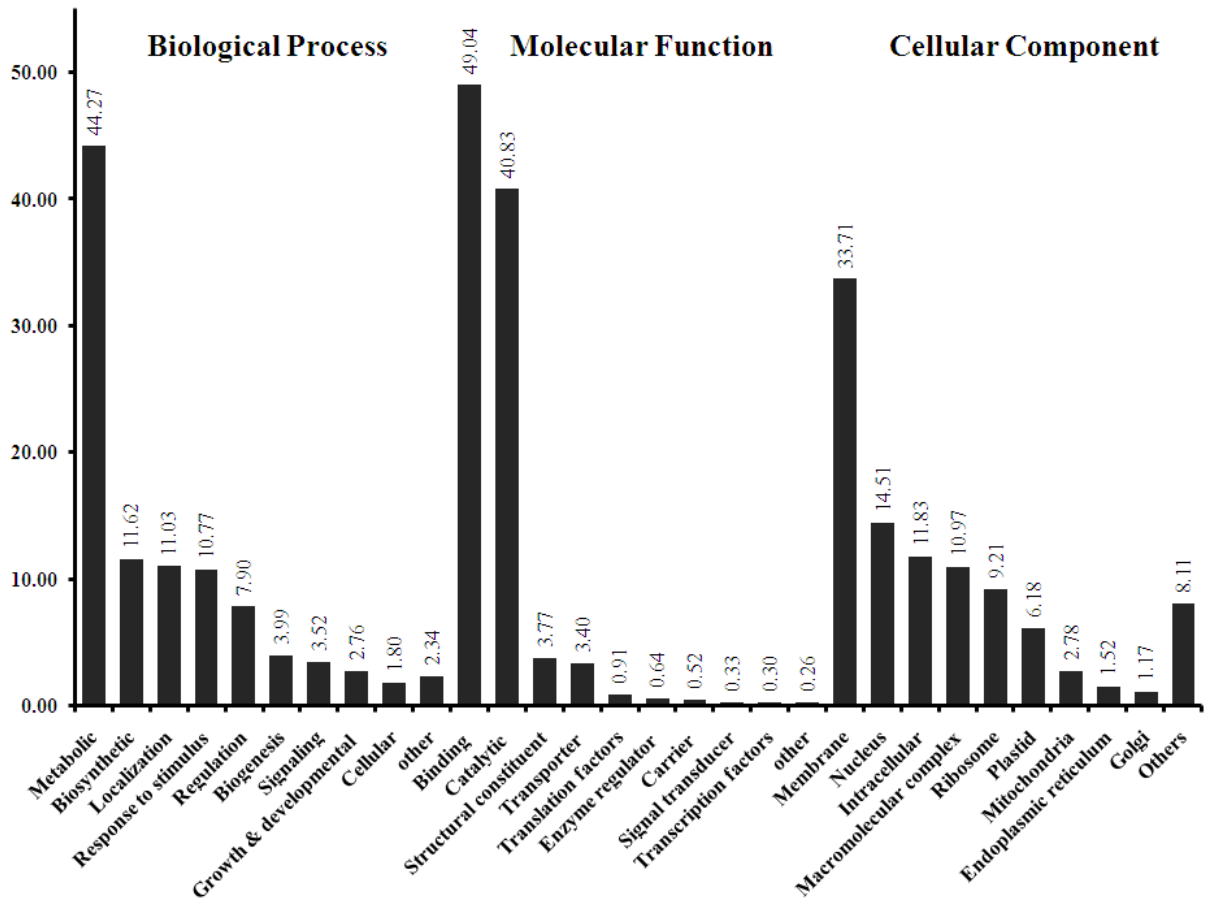

**Figure S3.** Gene ontology classification as derived from Uniprot annotation: Gene ontology has 3 main categories including Biological processes, Molecular function, Cellular component

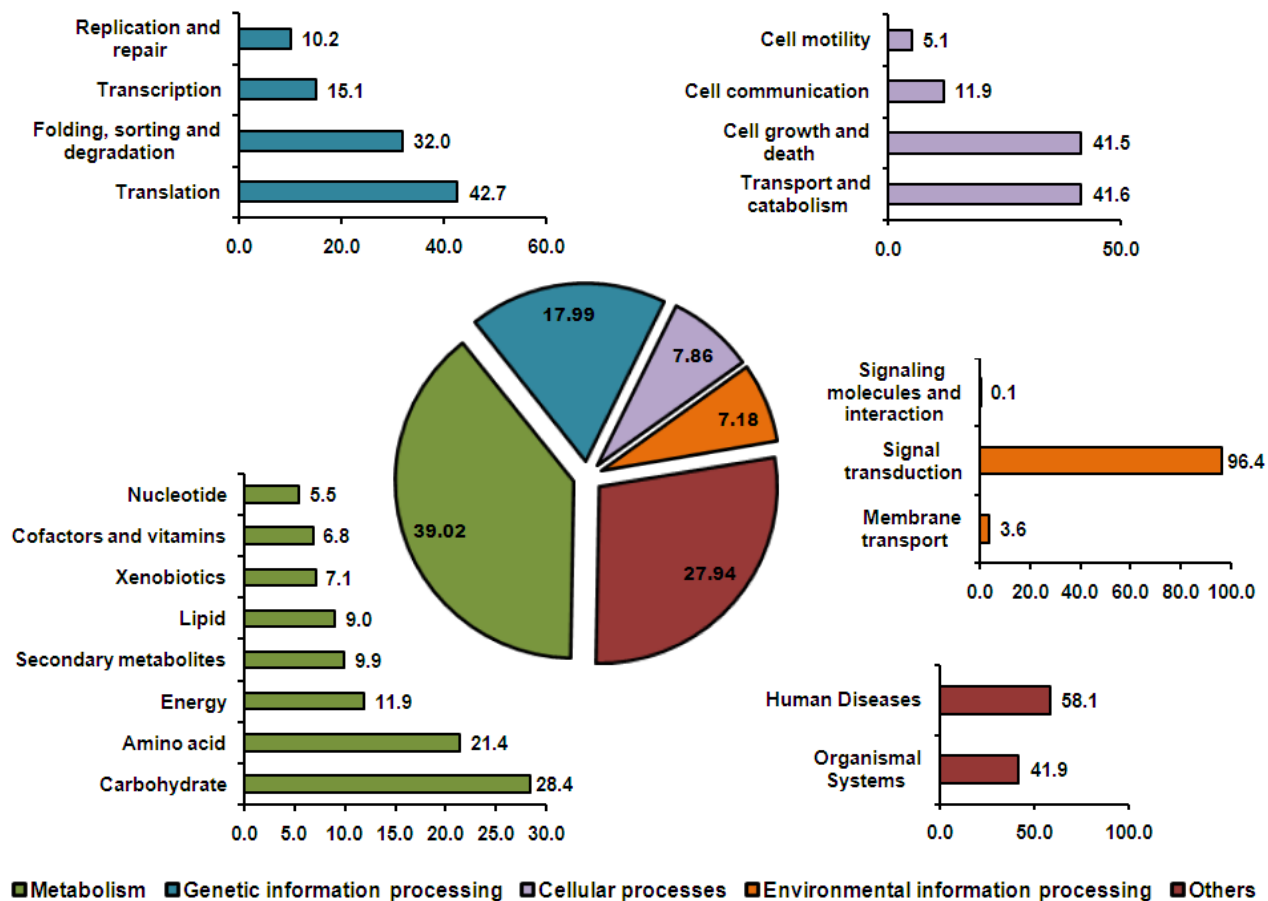

**Figure S4.** KEGG Orthology (KO) classification and distribution of transcripts identified by KASS into 5 main categories and their sub-categories.



**Figure S5.** Multiple sequence alignment of full length MkPKSs with characterized PKSIII. AmQNS, *Aegle marmelos* quinolone synthase (AGE44110); CmQNS, *C. microcarpa* quinolone synthase (BAO05328); HpPKS, *H. perforatum* polyketide synthase (ABP98922); MsCHS2, *Medicago sativa* Chalcone synthase 2 (P30074); NcPKS, *Neurospora crassa* type III Pentaketide Synthase (3EUQ); PaPQSH, *P. aeruginosa* 2-heptyl-3-hydroxy-4(1H)-quinolone synthase (Q9I0Q0); PpPKS1, *Physcomitrella patens* 2'-oxoalkylresorcinol synthase (ABU87504); RpBAS, *R. palmatum* benzalacetone synthase (Q94FV7). The conserved catalytic triad (Cys-164, His-303, and Asn-336) is star marked in red and the active site residues (132, 133, 137, 194, 197, 211, 215, 256, 338, and 375) are star marked in blue (numbering in *M. sativa* CHS) Alignment was built using MAFFT 7.271 and BOXSHADE 3.21.

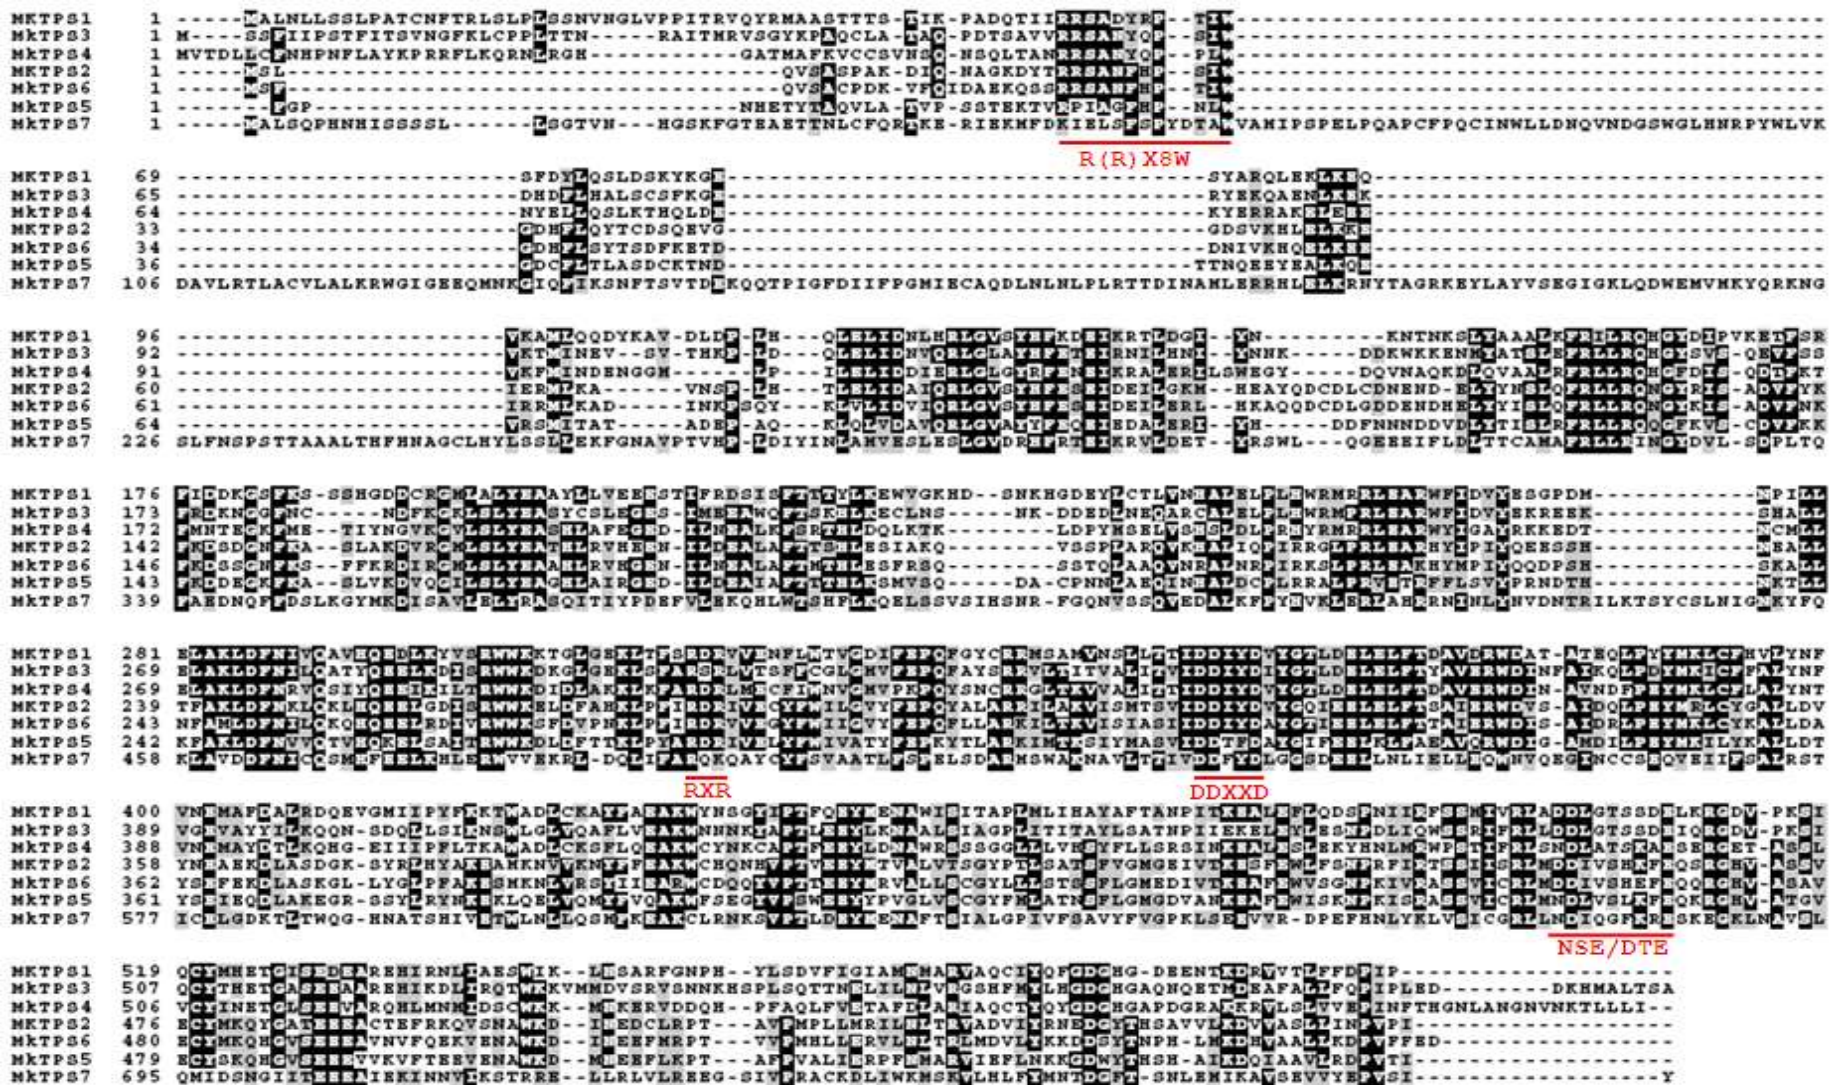

MKTPS1 1 MA---LNLLSSLPATCNFTRLSLPLSSNVNGLVPPITRVQY-----RMAASTTSTIKF-ADQTHIRRSADYRPTIWSFDYIQSL-DSNY--KGESYARQLEKLLK  
 RlemTPS2 1 MA---LNLLSSLPAAACNFTRLSLPLSSKVNGLVPPITRVQY-----HVAASAT--PIKP-VDQTHIRRSADYRPTIWSFDYIQSL-DSNY--KGESYARQSEKLLK  
 SoSS 1 MSSISINIAMPLNSLHNPER--KPSKAWSTCTAPFARLR-----ASSLQOEKQ-HQ---IRRSADYRPTIWSFDYIQSL-NTDY--KEQRHFNQOAEILI  
 HcMTPS7 1 MS-VSLSPAASAT-----PFRGGGLGGFSPAAAIKQWRCLPRTIQCHSAEQSQSP-----IRRSADYRPTIWSFDYIQSL-TLSHTADEDDHGERIKLLK  
 TpSS 1 MALFS---ASTSVLSSCLK--SPPNHVVKLFNKNSSQLSRRRLNPPISKASTTAVETP-----TRRTGNHHHPNWDGLIGTIQEQPY--DDSHCMERAEERLI  
 Peiss 1 MSVISIVPLASNSCLYKLSL---SSTHELKALCRPIATLGMCRRGKSVMASMSTLTTAVSDDGVO<sup>▼</sup>RRIGHHHSNWDNFIQSL-SSPY--GASBYAESAKKLI

**R(R)X8W**

MKTPS1 94 EOVKAMLQDDYKAVD-----EDPHOLELIDNHLRLGVSYHFDDEIKRITLDGIYKNTN-----KSLYAALNFRILRQHGVDIPVKETFSFIDDKG  
 RlemTPS2 92 EOVKAMLQDDYKAVD-----EDPHOLELIDNHLRLGVSYHFDDEIKRITLDGIYKNTN-----KSLYATALKFRILRQHGVDIPVKETFSFIDDKG  
 SoSS 88 MOVRMLK-----VK-----MEATQOLELIDDLQYLQESYFFODEIKQILSSLNENPRYF-----HNNDLYETALGFRILRQHGVDIPVKETFSFIDDKG  
 HcMTPS7 89 GQTNKLMEEKKGEVQ-----EQQLQIDHDLQQLGVAYHFDDEIKRITLDGIYKNTN-----PKDNLHAGALDFRILRENCFVSVS-EDHFKFKDQK  
 TpSS 92 GEIADLPNESGIFGQ-----ENAFERLVMVDKQRLAIDRHFCQIAQALDYVRYWSD-----CSRDLNSALGIRILRLNRYFVS-SDVLRHFKGNDG  
 Peiss 100 GEVKEIFNLSMAAGGLMSPVDDLEQHLMSVMDNVERLGDIDRHFCQIAQALDYVRYWSD-----CSRDLNSALGIRILRLNRYFVS-SDVLRHFKGNDG

MKTPS1 182 SF---KSSSHGDCRGMALALYEAAYLLVEEESTFPRDSISFTTTLKRWVGGKHSNKHGDEYLCTLVNHALELPLHWRMRLEARWFIDVYESGF----DMNPI  
 RlemTPS2 180 SF---KLSSSHDDCRGMALALYEAAYLLVEEESTFPRDATSFTTTLKRWVGGKHSNKHGDEYLCTLVNHALELPLHWRMRLEARWFIDVYENGP----DMSPI  
 SoSS 173 SD---PNANLAQDTKGMQLYEAASLLREGED-TLELARRFSTRSLRERKFPDEGGDEI--DEDLSSWIRHSLDLPLHWRVQGLEARWFDAYARRP----DMNPL  
 HcMTPS7 178 GQ---PEDRLQSQAEGLLSLYEASYLEKDGEE-LEHEAREFTTKLENLLEEEGSLI--PGLIREQVAYALELPLNRFPORLHTEWFIGAWQRDP----TMDPA  
 TpSS 181 QFLCPSAQSEEEKIGSILNLYRASLIAPPEEN-IMDEAKAFATTYLNQVLQNNNI----SSLSKKEIKYNLEYGWETNLPREARNYMDIYGENRNSWTEMGGNMQ  
 Peiss 204 RIAC-SANHTERQISSILNLFERASLIAPPEEK-VMERAEIIFSATYLRKALQITIPV----SSLSQEMQYVLDYRWBSNLPRLERTRTYIDILGETTINQMDDVNIQ

\*

MKTPS1 279 -LLELAKLDFNIVQAVHQEDLKYVSRWKKKTGLGKLTFSRDRVENFLWTVGDI FEP-QFGYCRRSAMVNSLETTIDDDYDVYGTLDLELELFTDAVD RWDATA  
 RlemTPS2 277 -LLELAKLDFNIVQAVHQENLKYASRWWKKKTGLGENLNFVRDRVENFLWTVGK FEP-QFGYFRRESTMVIALITAVDDYDVYGTLDLELELFTDAVERWDATA  
 SoSS 267 -LLELAKLDFNIVQAVHQEDLKYVSRWKKKTGLGKLTFSRDRVENFLWTVGDI FEP-QFGYCRRSAMVNSLETTIDDDYDVYGTLDLELELFTDAVD RWDATA  
 HcMTPS7 272 -LLELAKLDFNIVQAVHQEDLKYVSRWKKKTGLGKLTFSRDRVENFLWTVGDI FEP-QFGYFRRESTMVIALITAVDDYDVYGTLDLELELFTDAVERWDATA  
 TpSS 281 -LLELAKLDFNIVQAVHQEDLKYVSRWKKKTGLGKLTFSRDRVENFLWTVGDI FEP-QFGYFRRESTMVIALITAVDDYDVYGTLDLELELFTDAVERWDATA  
 Peiss 302 -LLELAKLDFNIVQAVHQEDLKYVSRWKKKTGLGKLTFSRDRVENFLWTVGDI FEP-QFGYFRRESTMVIALITAVDDYDVYGTLDLELELFTDAVERWDATA

**RXR**

**DDXXD**

MKTPS1 382 TEQLPYMKLCPHVLNPNVEMAPDALRDQEVGMIPYFKKTWADLCKAYFAEAWYNSGYIPTFOYEMENAWISITAPLMLIHAYFTANPITKEALEPLQDSP  
 RlemTPS2 380 TEQLPHYMKLCPHALNPNVEMAPDALRDQGVIVISYLTKAWADECKAYLVEAKWYNSGYIPSLQYEMENAWISIGSTVILVHAYFTANPITKEALEPLQDYP  
 SoSS 370 TEQLPYMQVQCYDALNPNVBERAMDILKDOHFN-SIPYLQRSWVSEVEGYLKEAWYNYGKPSLEYYLNNARISISAPTILISQLYPTLANSIDETALESYQYH  
 HcMTPS7 375 TEQLPEYMKICPLAVENTVNDAGYEMRDKGVN-IIPYLKRAWALCKMYMREARWHTGYTPTLDEYLDGAWISISGALILSTAY-CMGKDLTKEDLQKFPSTYP  
 TpSS 383 PNLSPENIKIAYKAFHMAVNESAAAKKTOGRD-IIPYARKVWEHYLIGLTKAEWLANGYIPSLREYLENGAPSSCYRVTMLOPTLTDALLPDNILLMDYPS  
 Peiss 405 TEQLPEYMKGVYIILYETVEMAREARKSQGRD-TLNVARLALBQYIGAYLKEAWISMVYDPTFEYFFKNGKVSCHRATLQPIITLTDIIPPHHLQBEDFPS

\*

MKTPS1 487 NIIRFSSMIIVRLADDLGTSSDELKRGDVPKSIQCYMHET-GISEDEAREHINLIASWIKLNSARFPGNPHYLSDVFIGIAMMARVACCIYQFGDGH--GDEEN  
 RlemTPS2 485 NIIRWSSVILRFADDLGTSSDELKRGDVHKSIQCYMHEA-GVSEGEAREHINDLIQATWMMKMRDRFPGNPHFVSDVFIGIAMNLRMSQCMYQFGDGHGCGAQEI  
 SoSS 474 NIIYLSGTILRLADDLGTSHLBRGDVPKAIQCYMNDT-NASREAVREHVYKFLIREAWEMNTVTASDCPFTDLVAAAANLARAACFIYLDGDGHG-VQHSE  
 HcMTPS7 478 SIYQPSMILLRLHDDFGTSTELARGDVQKAVOCMHER-KVPEAVAREHIQVMAKRVVLRNGNEVAASS-FEYFQNVAINLPRAACFFYKGDGYA-NADGE  
 TpSS 487 RPNELCLSLRLKGDTRTFKAEANRGEVSGISCYKDHFGSSEALDYLDLQKRLKELDQRYLKP-NNVPAISKDHAYNIARSYQLLYKERDQPT-NSNKD  
 Peiss 509 KPNELACSLRLKGDTRCYQADRDRGEEKASCISCYMKDNPSTBEDALNHINGMIBDTIKQLNWEELLRPDNNVPISSKKHSPDISRAFHHLRYRQDGYT-VSSNE

**NSE/DTE**

MKTPS1 589 TEKDRVVTLLFFDPIE-  
 RlemTPS2 589 TEARVLSLFIIDPIA-  
 SoSS 577 IHQQMGGLLFPQPVV-  
 HcMTPS7 580 IQKQVMSLLIEPVQ-  
 TpSS 590 IKDLVTQILIEPIPL  
 Peiss 613 TKNLVVRTVLEPPEM

**Fig. S7.** Amino acid alignment of MkTPS1 with other characterized sabinene synthases. Abbreviations with accession numbers: RlemTPS2, *Citrus jambhiri* (Rough lemon) sabinene synthase (BAF73933); HcMTPS7, *Hedychium coronarium* chloroplast monoterpene synthase (AHJ57305); PsSS, *Picea sitchensis* (+)-sabinene synthase (ADU85930); SoSS, *Salvia officinalis* sabinene synthase (O81193); TpSS, *Thuja plicata* sabinene synthase (AGO02736). The substrate binding, Asp-rich domain “DDXXD”, Arg-rich “RXR” and “R(R)X8W” motif, as well as a NSE/DTE motif are underlined in red. Cleavage site is marked with arrowhead.

MKTPS2 1 -----MSLQVSA-----SPAKDIQNA-GKD--YTRRSANPHPSIWGDHFLQYTCD--S[Q]EVLGGDSVKHL--E[PK]KEI[ER]MLKA-----VNSP[HT]TE  
VvAFS 1 -----MSVSPV-----TPIPTTQRVHHQE--VARSTANYPPNIWGDRLTYAPDDTVTQECKAOKIK----E[PK]KEV[R]KELKA-----SAHKSPELLK  
CaAFS 1 -----MSSNVSA-----IPN-----SFE--LI[RR]SAQ[FO]ASVWGDYPLSYH--SLPPEKGNKVMKQ[TE]E[PK]KEI[ER]MELVS-----TTKDEPEKLR  
MdAFS 1 ----MEFRVHLQADNEQKIPQ[N]QMKPEPE-ASYL[N]Q[RR]SANYKPNIWKNDFLDQ---SLISKYVGGDEYRKLSEK[TE]E[PK]KEV[K]IYISA-----ETMDLVAKLE  
PtAFS 1 ----MEYKQOVQV--VQNSFQCQNNSEDI-DRR--Q[RR]SANYKPNIWKYDFLQ---SLSKDYDEEQYRRE[TE]E[PK]KEV[S]IFV-----EAVDLDLAKLK  
PaAFS 1 MDLAVEIAMD[LA]VDD-----VERRVGDYHSNLDWDDDFHQ-----SLSTPYGASSYRERAR[TE]E[PK]KEV[K]EMPT[SI]SIEDG-ELTSDLLQRLW  
PtAFS1 1 -----MSSLAVDD-----A[RR]RVGDYHFNLDWDDALIQ-----SLSTPYGASPYRDVA[ER]LIGET[TE]KEMFASISIEDGDDEICYFLQRLW

R(R)X8W

MKTPS2 76 LIDAIQRLGVSYHFESEI[DE]ILGKMHE-AYQDCDLC--DNENDELYNSLQFRLLRQNGYRISADVFFYKFRDSDGNFKASLA---KDVRCMLSL[TE]ATHLRVHE  
VvAFS 79 LIDSIQLLGLTYHFERIEEALKDMYG-TYSLVD-----DNEDLTNASLRFRLLRQEGYGVPSDVFSKFRDKK[EG]NEKESLI---GDLPCMLALY[TE]ATHLMVHG  
CaAFS 73 LIDLIQRLGVSYHFESEI[NN]ILQQLHH-ITITSE-----KNGDDNPNMTLCYRLLRQGGYNVSEFPDRFR--CKWESSYD--NNVEELSLY[TE]ASQLRMQG  
MdAFS 89 LIDSVRKLGLANLFEKIKK[EA]LDSIAA--IESDN-----LGTRDDLYGTALHFKLRLRQEGYKVSQDIFGRFMOK[TE]LENHFF--AHLKGMLE[TE]EASNLGFEG  
PtAFS 83 LVD[SV]IKLGLG[SY]FE[EE]IK[QS]LDITAA-SIKKN-----LKVEENLYVTALR[FL]LR[DE]HG[E]YVSQGVFN[GF]ED--GTSDKSKC--TDVRCGLI[TE]EASHLAYEG  
PaAFS 80 MVDNVERLGISRHFENEIKAAIDYVYS-YWSDKGI[VR]GRDSAVPDLN[SI]ALGFRTLR[DE]HGYTVSSDVFVKVFD[RE]K[GE]FACS[A]I[TE]GDIKGVNLLRAS[SI]AFPG  
PtAFS1 74 MIDNVERLGISRHFENEIKAA[ME]DVYSRHWSDKGIACGRHSVVADLNSTALAFRTLR[LE]GYSVCS[DV]FKIFQDQK[GE]FACSADQTEGEIKGILNLLRASLIAFPG

MKTPS2 174 ENILDEALAF[TT]SH[FE]SI--AKQV-SSP--L[AR]QV[KH]AIQPIRRGLPRL[BA]RHYIPIYQ[EE]S-----SHNEALL[TE]FAKLD[FN]K[LQ]K[LH]Q[EE]P[GD]ISRWWKE  
VvAFS 173 EDIL[EE]ALAF[TT]AH[EQ]SV--ATDP-NNP--L[SK]QV[IR]ALKLSIHNGVTSV[GA]RHYISYIYQ[ED]G-----SHNESLL[TE]KAKLD[FN]L[LO]SLH[RE]K[EL]SEITRWWK-  
CaAFS 166 E[EA]LDEAF[CF]ATAQ[LE]AI--VQDP-TTDP[M]VA[EB]RQAL[KW]PMYKNL[PR]LKARHHI[GL]YSEK[PE]-----WRNESLL[TE]NAKMD[FN]K[LQ]N[LH]Q[TE]EAYIS[TE]KWWDD  
MdAFS 184 EDILDEAKASLTL[AR]DRDSGHICYP-DSN--L[SR]DV[VS]HSL[EL]P[SH]RRVQWDFVWQINAYEKDI-----CRVNATLLE[LA]KLNFNVVQAQLCKN[RE]ASRWAN  
PtAFS 177 EATLDEAKAFS[TR]IPTGE--NCSAIESD--L[AK]HV[VH]VLEL[PS]HWRVMWFDV[WH]INAYENDK-----Q[TR]RHLL[TE]LAKVNFNMVQATLQK[DE]GDVSRWWEN  
PaAFS 184 EKVM[EA]Q[TF]AATY[KE]A--LQKIQVSS--L[SR]EIEYVLEYGWLTNFPRL[EA]RNYIDV[FE]G[E]ICPYFKKPCIMV[DK]LLE[LA]KLE[FN]L[PH]S[LO]Q[TE]LKHVSRWWKD  
PtAFS1 179 ERILQ[EA]E[IF]AT[TY]L[KE]A--LPKIQGSR--L[SQ]EIEYVLEYGWLTDL[PR]LE[TR]NYIEVLA[EB]ITPYFKKPCMAV[EK]LL[TE]LAKIE[FN]L[PH]S[LO]Q[TE]LKHISRWWKD

MKTPS2 266 LDFAHKLPPIRDRIVECYFWILGVYFEPQYAL[ER]LAKVISMTSVI[DD]IYDYGQ[EE]LELFTSAIERW[DV]SAIDQ[LP]EYMR[LC]Y[GAL]LDVYNE[AE]KDLAS---  
VvAFS 264 VRLCHEATFARDRIEYIYFSALGVC[FEP]QY[SL]SLRPLTKVAIMITVDDIYDAYGTEBELTLLTEA[ER]W[DV]ASSIDQ[LP]EYMI[CF]YR[AL]LDLYE[ME]EQEMAK---  
CaAFS 260 YGFAEKLSFARNRIVEGYFFALGIFPEPQLLTA[RI]IMTKVIAIGSMLDDIYDYGTFP[EL]KLLTLAL[ER]W[DV]S[TE]KQ[LP]NYMKMYE[BA]LLDVPE[EE]EQ[MS]QKET  
MdAFS 279 LGIADNLKPFARDRIVECFACAVGVAFEPEHSS[FR]ICLTKVINLVLI[DD]VYDYGSEELKHFTNAVDRWDSRE[TE]Q[LP]ECMKMCFQVLYNTTCEI[AR]EIEE--  
PtAFS 270 LGIENLSFTDRDREVESFLCTVGLVFE[PK]YBSF[KW]LTKVIMILIIDDVYDYGSELELQ[CF]TKAVSRWDTG[EV]Q[EL]PE[CM]KICE[OT]LYDITNE[ME]A[EM]QRE--  
PaAFS 285 SGFS-QLTFTRR[RE]VEFYTLASCI[AI]IRPKHSAFRLGF[AK]VCYLGI[VLD]DIYDTEGKMKLELFTAAIKRWD[PS]TE[CL]PEYMKGVYMAFYNCVNE[AL]QAEK---  
PtAFS1 280 SGFA-QLTFTRR[RE]VEFYTLASCIAMEPKHSAFRLGF[AK]CYLGI[VLD]DIYDYGKMELELFTAAIKRWD[PS]TE[CL]PEYMKGVYMAFYDCVNE[AR]QAEK---

RXR

DDXXD

MKTPS2 368 DGKSYRLHYAK[EA]MKNVKNYFF[EA]K[CH]QNHVPTVEEYMTVALVTS[CY]PTLSATSPVGMGE-IVTKESFEWLFSPNRFIRTS[SI]ISRLMDDIVSHKPEQSRGHV  
VvAFS 366 EGKLYRVHYAK[EL]MKKQIQSYFVEAKWSNQGYP[PE]DEYMSNGVVSGCCSLLIATSEVGMGD-IVTKESFQWVLSRPTMIGASQIICRLMDDMASHEPEQKRVHV  
CaAFS 365 ETTPYCIHHM[EA]TKELGRVFLVEATWCKE[GY]TPPEYBYLDIALISF[CH]KLLMVTALLGMSHMATQOIVQWITSPMNLKASAVICRLMNDIVSHKPEQERGHV  
MdAFS 382 NGWNQVLPQLTKVWADFCALLVE[AW]YKSHIPT[EE]YLRNCGISSVSVLLVHSPFSITH-EGTKEMADFLHKNE[DL]LYNISLIVRLNNDLGTSA[AE]Q[ER]GDS  
PtAFS 373 KDGSQALPHLKKVWADFCAMFMEAKWFNE[GY]TPSLQBYLSNAWVSSSGTVISVHSEF[SV]MTELE[TE]G[E]ISN[FE]LKNQD[LL]YNISLIIRLCNDLGTSA[AE]Q[ER]GDA  
PaAFS 386 TQGRDMLN[AR]KAW[EA]LFDAFL[EA]K[WI]SSGYLTPPEYBYLENGKVSFCYRAATLQPI[LT]LDI-PLPLHILQ[Q]IDFPPSRFNDLASSILRLRGD[IC]GYQ[AE]RSRGE  
PtAFS1 381 TQGWDTLDYAR[TE]W[EA]LIDAFMEAKWISSGYLTPQNYLDNGKVSFCYRAATLQPI[LT]LDI-PLPLHILQ[Q]EIDFPPSSFNDLASSILRLRGD[IC]GYQ[AE]RSRGEQ

MKTPS2 472 ASSVECYMKQY-CATE[EB]ACTEPRKQVSN[AW]KD-INEDCLRP--TAVPMLLMRILNLT[RV]ADV[IR]NEDGYTHSAV-VLQDVVASLLINPVPI-----  
VvAFS 470 ASSVECYMKQY-CVSKQ[EA]YDELN[Q]VVKAWKD-INQ[EC]LRP--TPVLMPIIT[RE]V[NI]ARMN[IL]YKDGDEFT[HV]GK-QR[KD]LTIASILIDPVPM-----  
CaAFS 470 ASAIECYMEQN-HLSEY[EA]LIALR[Q]KQIDDLKDMVENYCAVITEDEVP[RG]VLMRVLNL[TE]LFNVYIYKDGQY[TE]QSHG-STKAHIKSLLVDSVPL-----  
MdAFS 486 PSSIVCYMREV-NASEETARKNIKGMIDNAWK-VNGKCF[TT]NQV[PF]LSSFMNATN[AR]VAHSLYKDGQDGFQDQEK-GPRTHILSLLFQ[PL]VN-----  
PtAFS 478 ASSVACMREV-NVSEEVARNHINNIVKKTWK-INGHCPTK--SPTLQLLVNINT[AR]VVHNLYQHGDGFGVQDRHEN[KK]QILTLLEVPFKLDLPEFSP  
PaAFS 490 ASSISCYMKDNP[ST]EEDALSHINAMISDNINE-INWELLKFN-SNVPISSKKHAPDIL[RA]FYHLYKYRDGFSIAKI-ETENLVMRTVLEDPVM-----  
PtAFS1 485 ASSISCYMKDNP[ST]EEDALSHVNAMIGDKIPE-FNWEFMKP--SKAPISSKYPDIL[RA]FYHLYKYRDGFSIAKI-ETKLVLMRTVLDPVPM-----



**Fig. S8.** Sequence relatedness of MkTPS2 with other characterized  $\alpha$ -farnesene synthases. CsAFS, *Cucumis sativus* E,E-alpha-farnesene synthase (AAU05951); MdAFS, *Malus domestica* (E,E)- $\alpha$ -farnesene synthase (001280822); PtAFS, *Populus trichocarpa*  $\alpha$ -farnesene synthase (AEI52902); PaAFS, *Picea abies* (E,E)- $\alpha$ -farnesene synthase (AAS47697); PtAFS1, *Pinus taeda*  $\alpha$ -farnesene synthase (AAO61226)VvAFS1, *Vitis vinifera*  $\alpha$ -farnesene synthase (ADR74198); VvAFS2, *Vitis vinifera* (E,E) $\alpha$ -farnesene synthase (ADR7419). Asp-rich domain “DDXXD”, Arg-rich “RXR” and “R(R)X8W” motif are underlined in red.

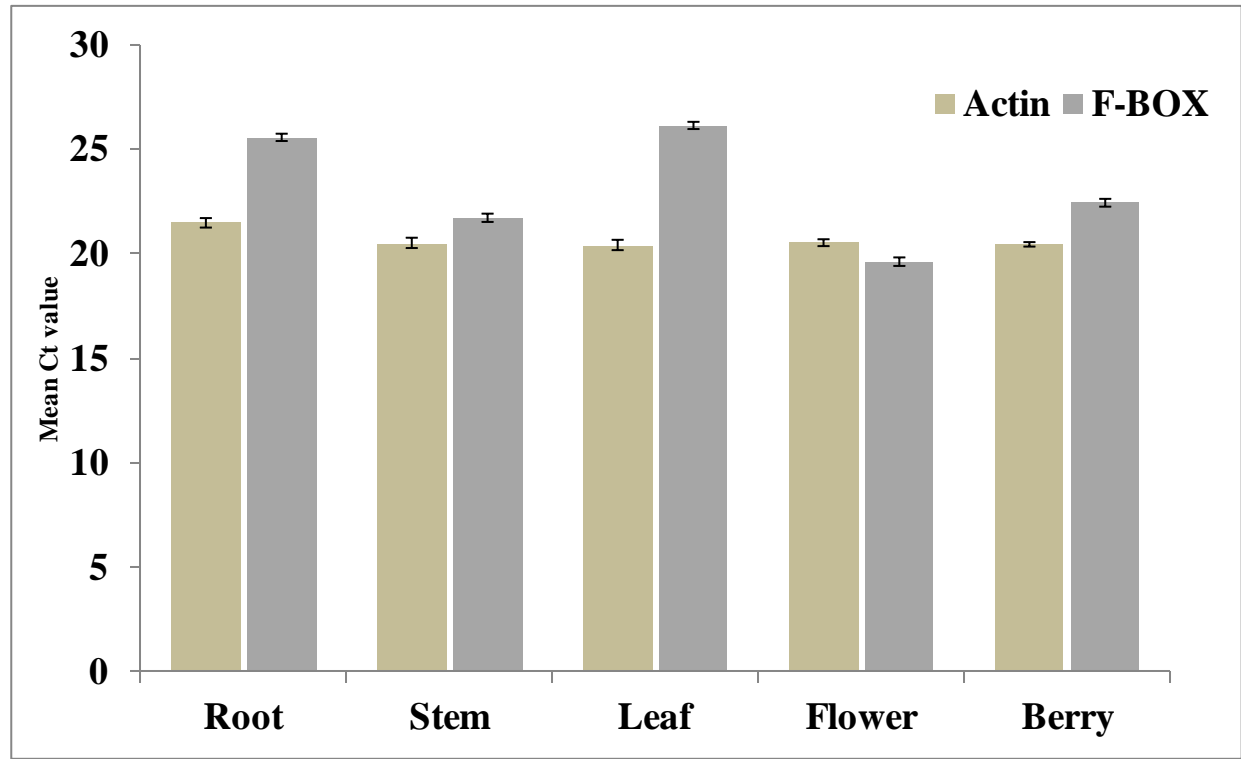

**Fig. S9.** Expression profiling of reference genes in *M. koenigii* - Mk Actin and Mk F-BOX were used to check the stability in different tissues of *M. koenigii*

## Chromatogram of Standard Mixture – Expanded view

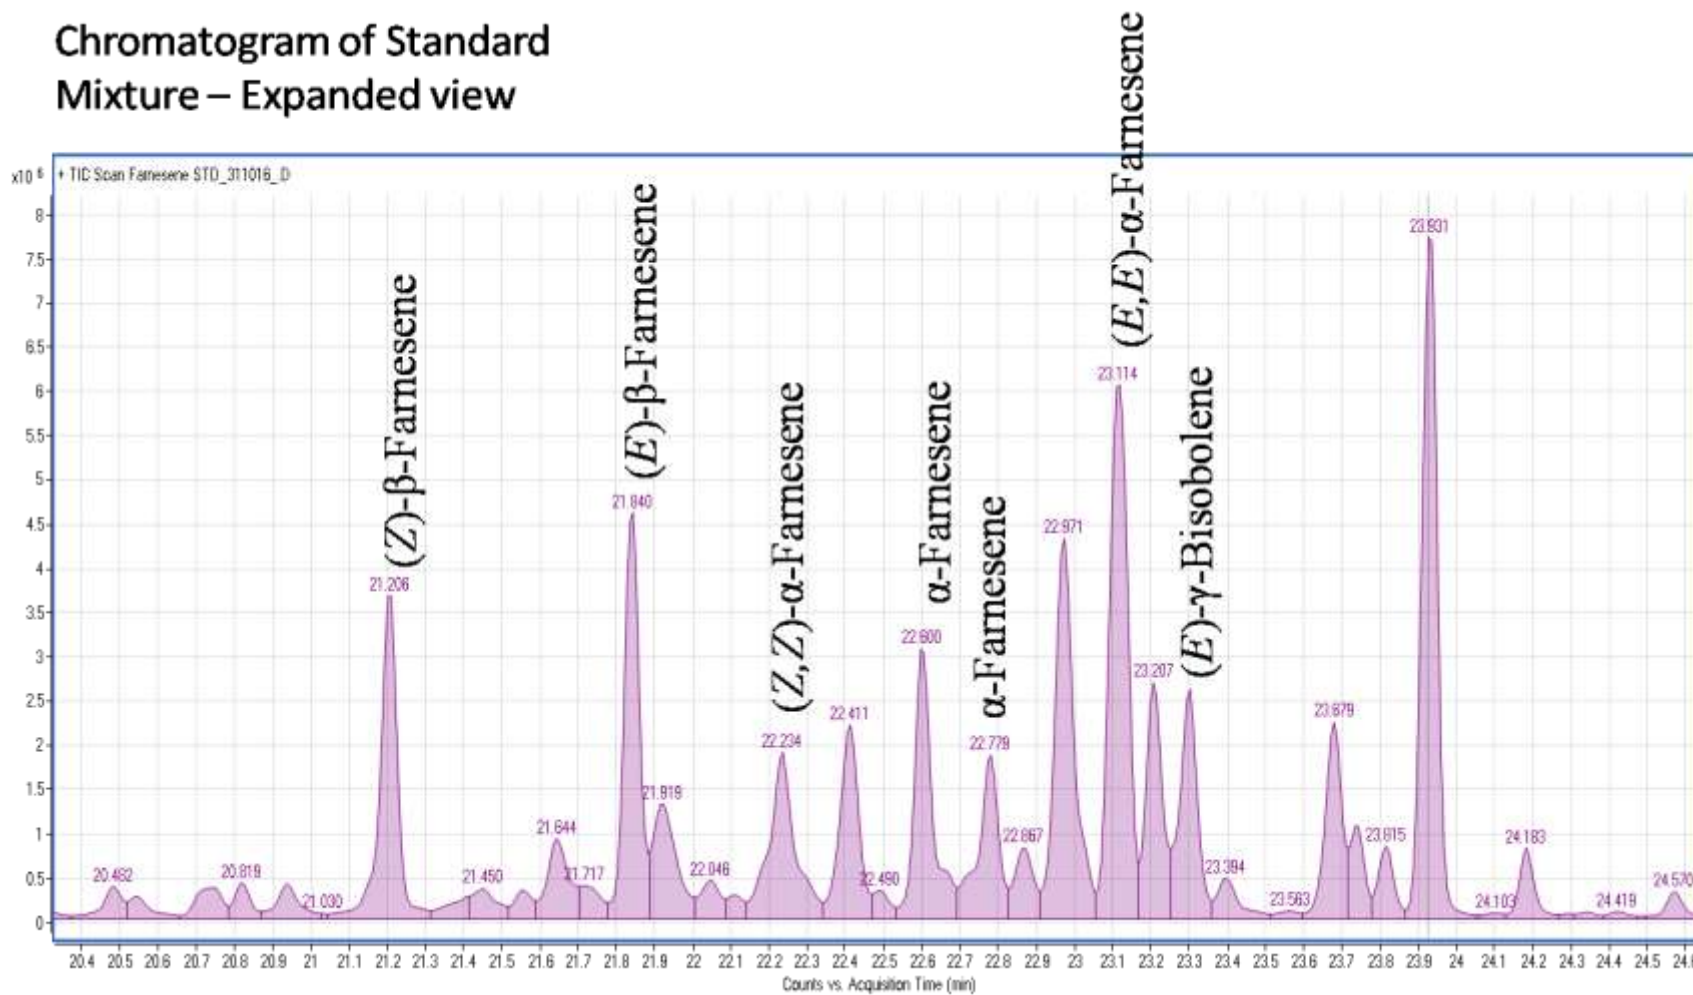

**Fig. S10.** GC-MS chromatogram of farnesene standard mixture and the respective mass spectra of individual geometric isomers.

### (Z)- $\beta$ -Farnesene

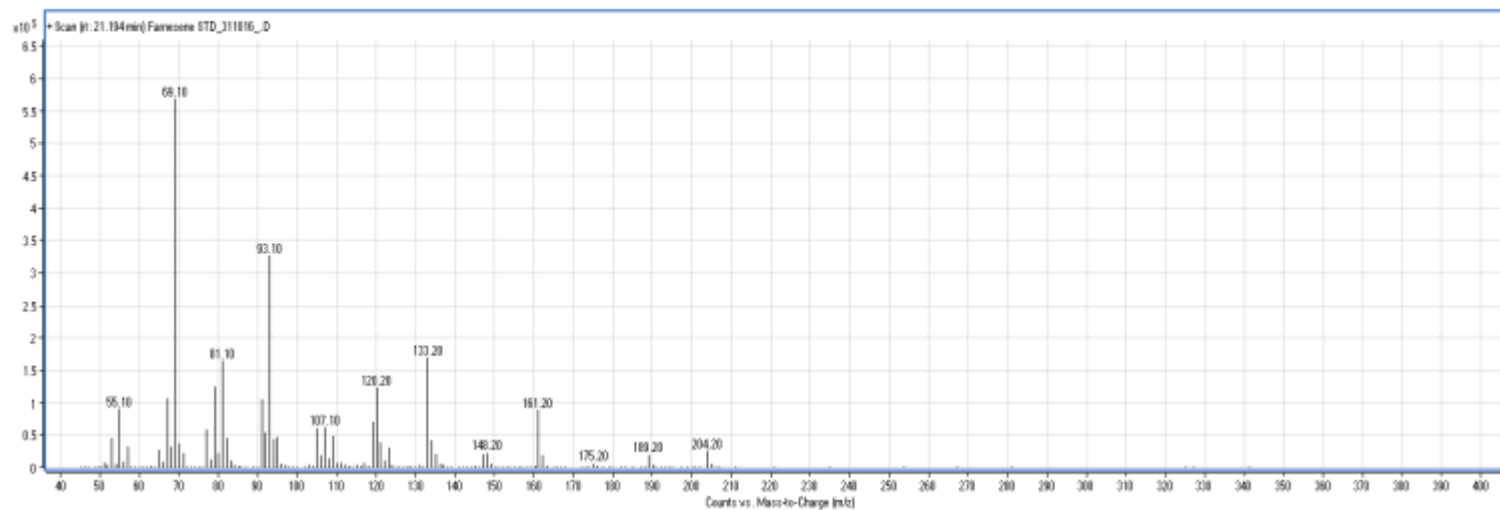

### (E)- $\beta$ -Farnesene

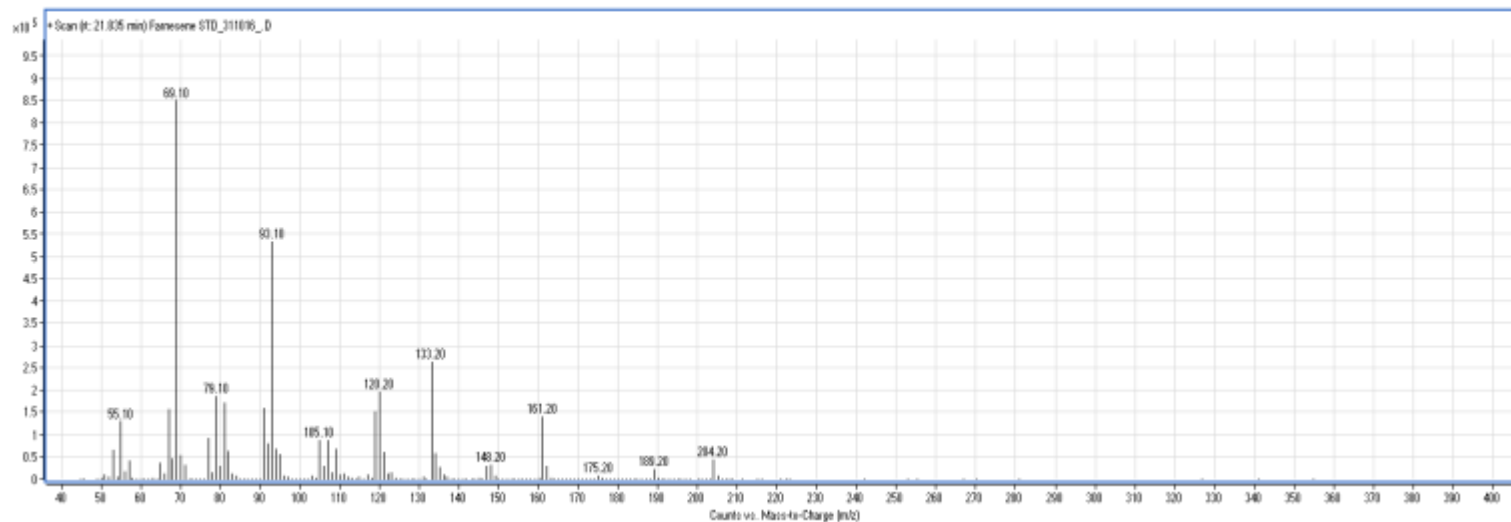

Fig. S10. Cont...

## (Z,Z)- $\alpha$ -Farnesene

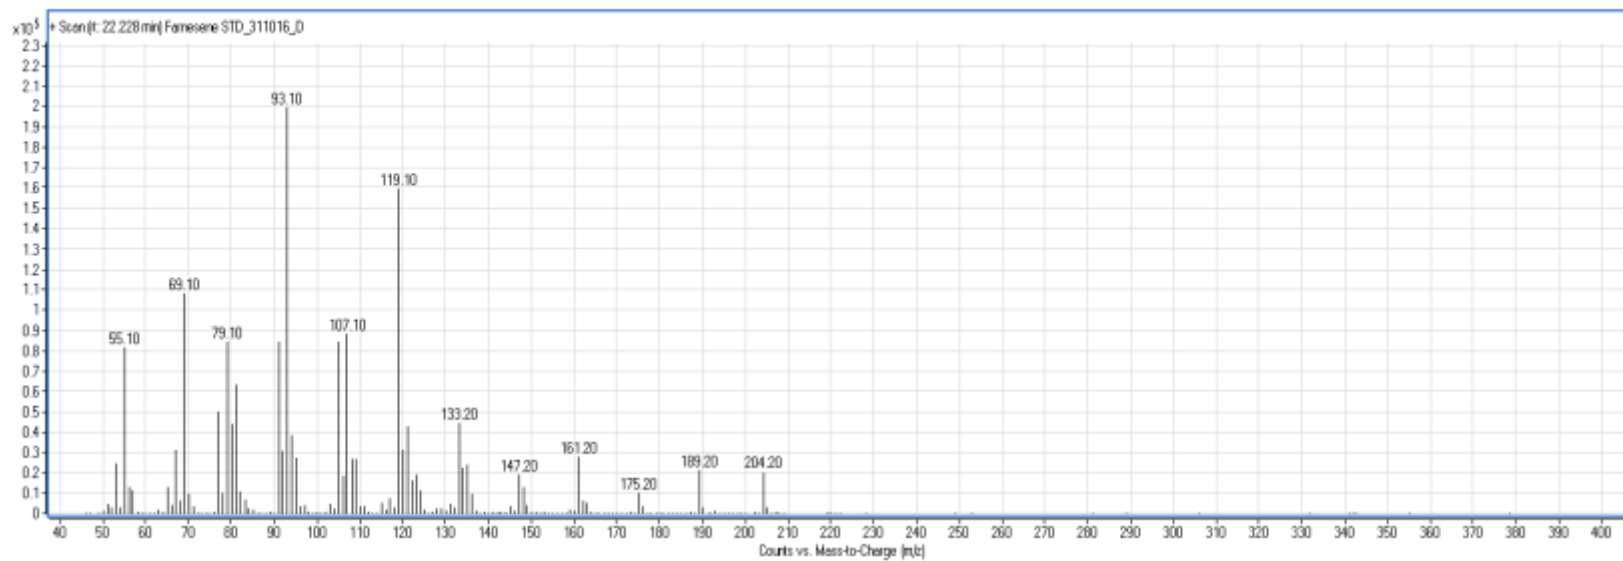

## $\alpha$ -Farnesene

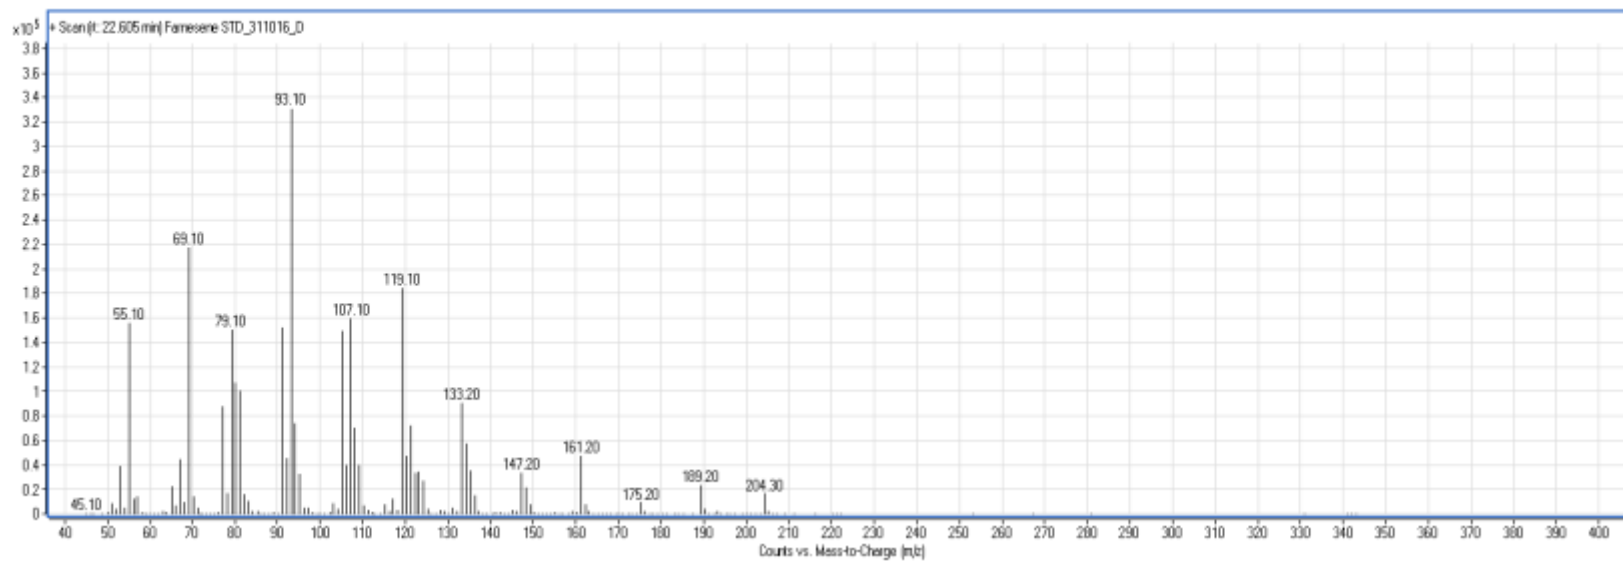

Fig. S10. Cont...

## $\alpha$ -Farnesene

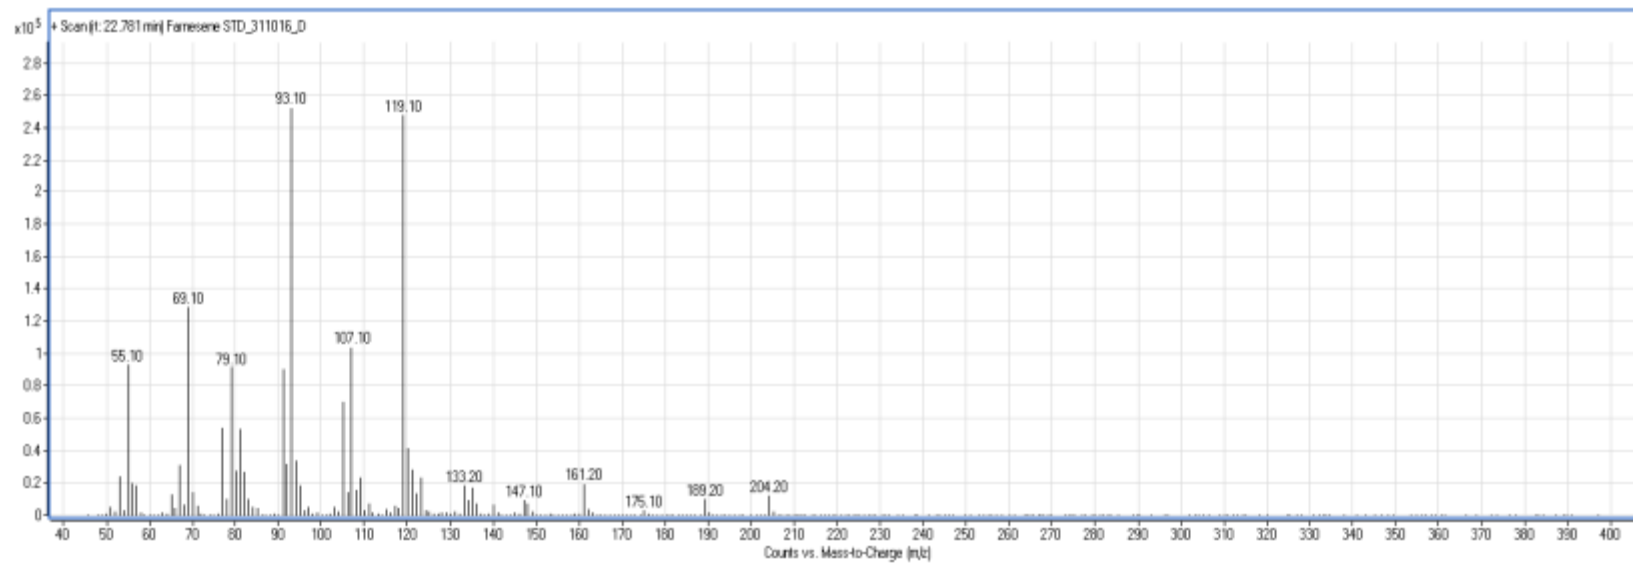

## (*E,E*)- $\alpha$ -Farnesene

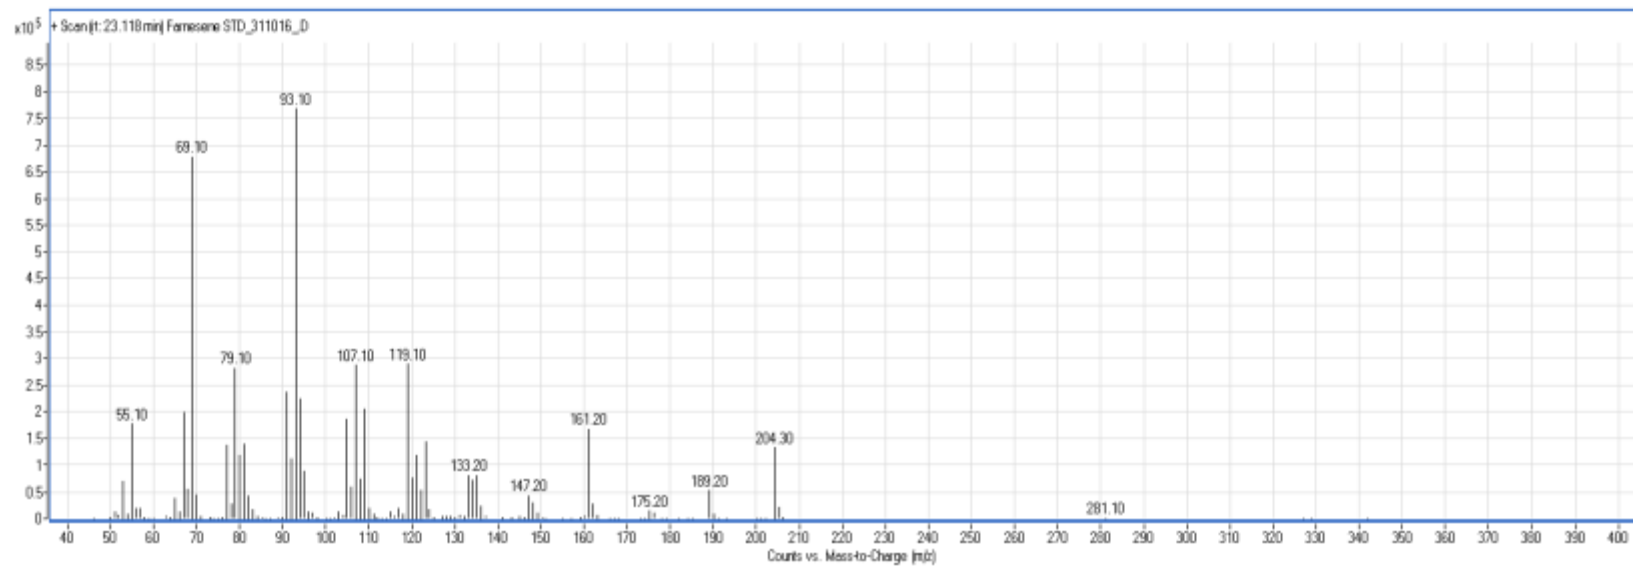

Fig. S10. Cont...

# (E)- $\gamma$ -Bisabolene

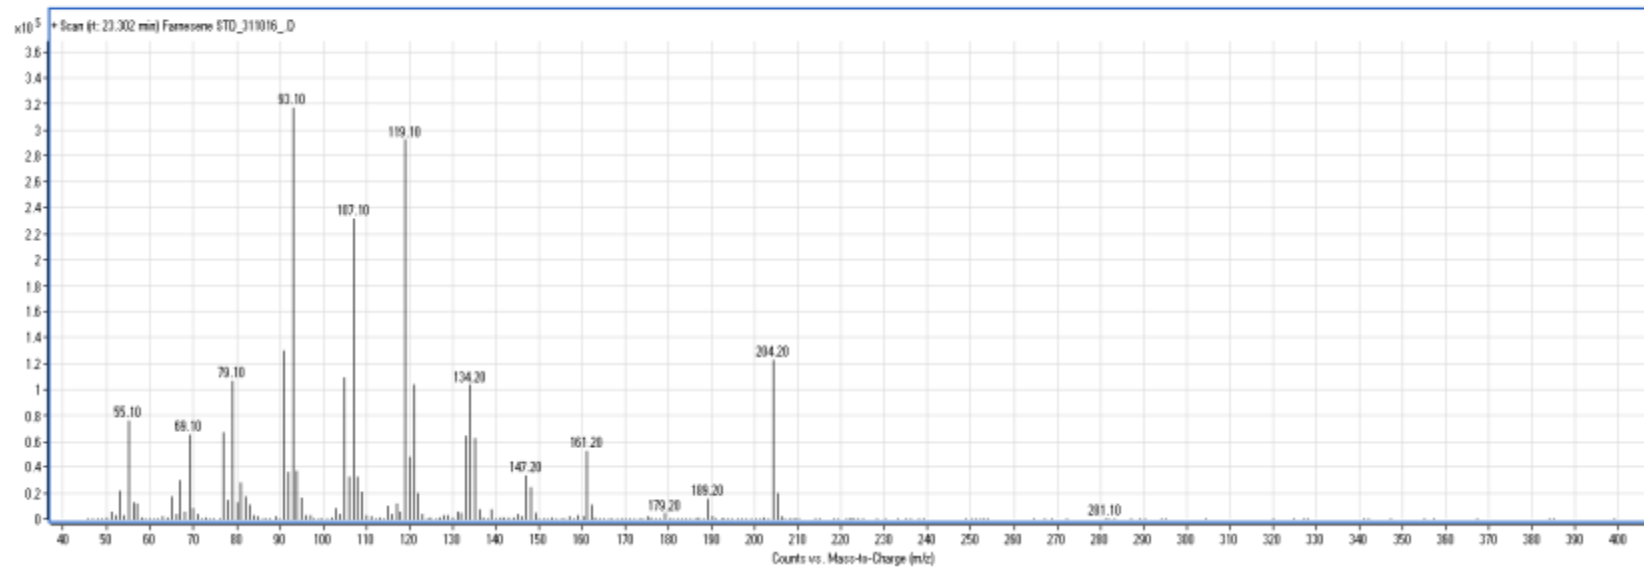

Fig. S10. Cont...

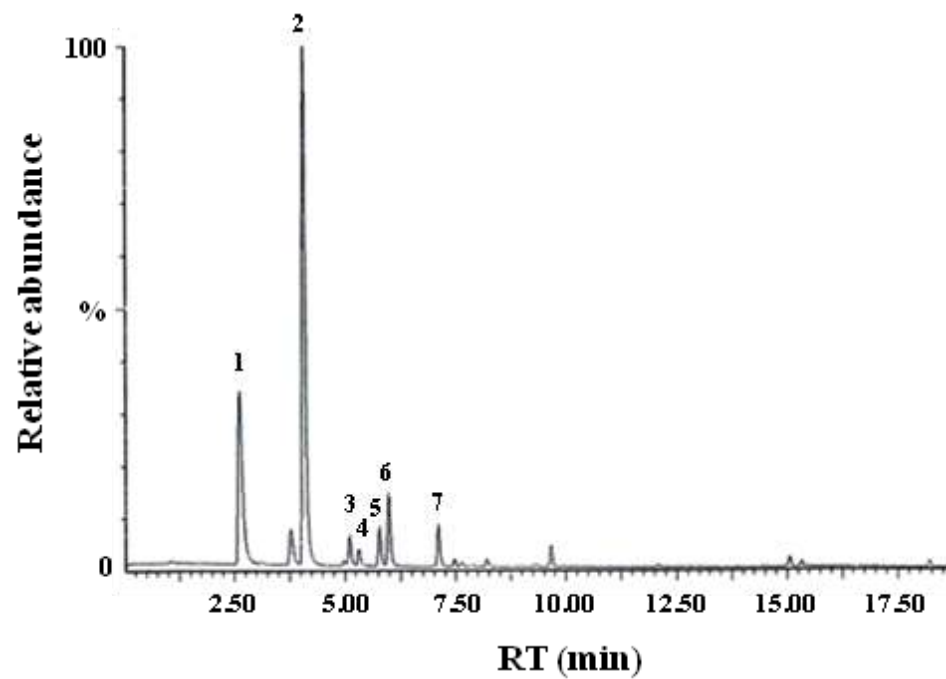

**Fig. S11.** Headspace volatile analysis of *M. koenigii* leaves by GC-MS. Peaks: 1,  $\alpha$ -pinene; 2, sabinene; 3,  $\beta$ -myrcene; 4,  $\alpha$ -terpinene; 5, limonene; 6,  $\beta$ -phellandrene; and 7,  $\gamma$ -terpinene.



### Accession numbers used in Figure 3

AaOKS1, *Aloe arborescens* octaketide synthase 1 (Q3L7F5); AaPCS, *A. arborescens* pentaketide chromone synthase (Q58VP7); AbDpgA, *Amycolatopsis balhimycina* dihydroxyphenylacetic acid synthase (CAC48378); AhSTS, *Arachis hypogaea* stilbene synthase (BAA78617); AmQNS, *Aegle marmelos* quinolone aynthase (AGE44110); AtCHS, *Arabidopsis thaliana* chalcone synthase (AAA32771); BsNCHS, *Bacillus subtilis* naringenin-chalcone synthase (AAA96613); CsCHS, *Cannabis sativa* chalcone synthase (AAL92879); CmACS, *Citrus microcarpa* acridone synthase (BAO05327); CmQNS, *C. microcarpa* quinolone synthase (BAO05328); CsPKSIIB, *C. sinensis* polyketide synthase type III B (XP\_006487398); ClCHS, *Curcuma longa* chalcone synthase (BAQ35543); CIDCS, *C. longa* diketide CoA synthase (C0SVZ5); ClCURS1, *C. longa* curcumin synthase 1 (C0SVZ6); EcFABH, *Escherichia coli* K-12 beta-ketoacyl-ACP synthase III (P0A6R0); Gh2PS, *Gerbera hybrida* 2-pyrone synthase (P48391); GhCHS1, *G. hybrida* naringenin-chalcone synthase 1 (P48390); GmBPS, *Garcinia mangostana* benzophenone synthase (AEI27291); HaBPS, *Hypericum androsaemum* benzophenone synthase (Q8SAS8); HpOKS, *H. perforatum* octaketide synthase (ACF37207); HpPKS, *H. perforatum* polyketide synthase (ABP98922); HmSTS, *Hydrangea macrophylla* stilbenecarboxylate synthase (AAN76182); HsPKS1, *Huperzia serrata* chalcone synthase-like polyketide synthase 1 (ABI94386); MpSTCS, *Marchantia polymorpha* stilbene carboxylate synthase 2 (AAW30010); MsCHS2, *Medicago sativa* Chalcone synthase 2 (P30074); MtPKS1, *Mycobacterium tuberculosis* phenolphthiocerol synthesis type-I polyketide synthase (CEZ67477); NcPKS, *Neurospora crassa* type III Pentaketide Synthase (3EUQ); OsCHS1, *Oryza sativa* Chalcone synthase 1 (A2ZEX7); OsCUS, *O. sativa* Curcuminoid synthase (Q8LIL0); PaPQSD, *Pseudomonas aeruginosa* 2-heptyl-4(1H)-quinolone synthase (P20582); PaPQSH, *P. aeruginosa* 2-heptyl-3-hydroxy-4(1H)-quinolone synthase (Q9I0Q0); PBBS, *Phalaenopsis sp.* bibenzyl synthase (CAA56276); PiPKS, *Plumbago indica* polyketide synthase (BAF44539); PnVPS, *Psilotum nudum* valerophenone synthase (Q9SLX9); PpPKS1, *Physcomitrella patens* 2'-oxoalkylresorcinol synthase (ABU87504); PsCHS, *Pisum sativum* chalcone synthase

(BAA01512); PsCHS, *Pinus strobus* chalcone synthase (CAA06077); PsSBS, *P. strobus* stilbene synthase (CAA87013); RgACS2, *Ruta graveolens* acridone synthase 2 (Q9FSC0); RgCHS1, *R. graveolens* chalcone synthase 1 (Q9FSB9); RpALS, *Rheum palmatum* aloesone synthase (AAS87170); RpBAS, *R. palmatum* benzalacetone synthase (Q94FV7); SaBIS, *Sorbus aucuparia* biphenyl synthase (ABB89212); SbARS1, *Sorghum bicolor* alkylresorcinol synthase 1 (XM\_002449699); SbARS2, *S. bicolor* alkylresorcinol synthase 2 (XM\_002441794); ScTHNS, *Streptomyces coelicolor* 1,3,6,8-tetrahydroxynaphthalene synthase (Q9FCA7); SgTHNS, *Streptomyces griseus* 1,3,6,8-tetrahydroxynaphthalene synthase (Q54240); VvTHS1, *Vitis vinifera* resveratrol synthase 1 (P28343); ZmCHS2, *Zea mays* chalcone synthase 2 (P24825).

#### Accession numbers used in Figure 4

AbLIMS, *Abies grandis* (-)-4S-limonene synthase (AAB70907); AaLIS, *Actinidia arguta* linalool synthase (ADD81294); AdGDS, *Actinidia deliciosa* germacrene-D synthase (AAX16121); *Antirrhinum majus* nerolidol/linalool synthase 1 (ABR24417); AtTPS02, *Arabidopsis thaliana* Terpene synthase 02 (POCJ43); AtTPS10, *A. thaliana* Terpene synthase10 (Q9ZUH4); AmNES/LIS-1; Cs $\alpha$ PINS, *Cannabis sativa* (+)- $\alpha$ -pinene synthase (ABI21838); CjGES, *Citrus jambhiri* geraniol synthase (BAM29049); RlemTPS2, *C. jambhiri* sabinene synthase (BAF73933); RlemTPS4, *C. jambhiri*  $\delta$ -elemene synthase (BAP74389); Cj $\beta$ PINS, *C. jambhiri*  $\beta$ -pinene synthase (BAF73933); Cju $\beta$ FS, *C. junos* (E)- $\beta$ -farnesene synthase (Q94JS8); CILIMS2, *C. limon* limonene synthase 2 (AAM53946); C $\beta$ PINS, *C. limon* (-)- $\beta$ -pinene synthase (AAM53945); ChTPNS, *C. limon*  $\gamma$ -terpinene synthase (Q8L5K4); CsiVLS, *C. sinensis* valencene synthase (NP\_001275785); CudLIMS, *C. unshiu* limonene synthase (BAD27257); CuLIS, *C. unshiu* linalool synthase (BAP75559); Cu $\beta$ OCS, *C. unshiu* (E)- $\beta$ -ocimene synthase (BAD91046); CuyTPNS, *C. unshiu*  $\gamma$ -terpinene synthase (BAD27259); CbLIS2, *Clarkia breweri* linalool synthase 2 (AAD19840); CcLIS, *C. concinna* linalool synthase (AAD19839); Cm $\alpha$ -FS1, *Cucumis melo*  $\alpha$ -farnesene synthase (B2KSJ6); Cs $\alpha$ FS, *C. sativus* (E,E)- $\alpha$ -farnesene synthase (AAU05951); CmCPS, *Cucurbita maxima* copalyl diphosphate sythase (AAD04292); Ga $\delta$ CDS, *Gossypium arboreum* (+)- $\delta$ -cadinene synthase (AAB41259); HcMTPS7,

*Hedychium coronarium* chloroplast monoterpene synthase (AHJ57305); Md $\alpha$ FS, *Malus domestica* (*E,E*)- $\alpha$ -farnesene synthase (Q84LB2); Mp $\beta$ FS, *Mentha piperita*  $\beta$ -farnesene synthase (O48935); ObGES, *Ocimum basilicum* geraniol synthase (Q6USK1); OsKSL10, *Oryza sativa* Ent-sandaracopimaradiene synthase (Q2QQJ5); OfTPS4, *Osmanthus fragrans*  $\alpha$ -farnesene synthase (AMB57288); Ppent-KS, *Physcomitrella patens* (-)-ent-kaurene synthase (BAF61135); Pa $\alpha$ BS, *Picea abies* *E*- $\alpha$ -bisabolene synthase (AAS47689); PaLIS, *P. abies* (-)-linalool synthase (AAS47693); Pa $\alpha$ FS, *P. abies* *E,E*- $\alpha$ -farnesene synthase (AAS47697); PsLIMS, *P. sitchensis* (-)-limonene synthase (ABA86248); PsPINS, *P. sitchensis* pinene synthase (AAP72020); PsSS, *P. sitchensis* (+)-sabinene synthase (ADU85930); *Pinus sylvestris* *E*- $\beta$ -farnesene synthase (ADH29869); Pt $\alpha$ FS Ps $\beta$ -FS, *Pinus taeda*  $\alpha$ -farnesene synthase (AAO61226); Pt $\alpha$ -FS, *P. taeda*  $\alpha$ -farnesene synthase (Q84KL5); PaIPS, *Populus alba* isoprene synthase (Q50L36); PtIPS, *P. tremuloides* isoprene synthase (Q7XAS7); Rc $\alpha$ -FS, *Ricinus communis*  $\alpha$ -farnesene synthase (B9RXW0); SoSS, *Salvia officinalis* (+)-sabinene synthase (O81193); SrCPS, *Stevia rebaudiana* copalyl pyrophosphate synthase (AAB87091); TpSS, *Thuja plicata* sabinene synthase (AGO02736); Vv $\alpha$ -FS1, *Vitis vinifera*  $\alpha$ -farnesene synthase (ADR74198); Vv $\alpha$ FS2, *V. vinifera*  $\alpha$ -farnesene/ $\beta$ -ocimene synthase (ADR74207); VvVLS, *V. vinifera* valencene synthase (Q6Q3H2).
